1 **Systemic silencing and DNA methylation of a host reporter gene**  
2 **induced by a beneficial fungal root endophyte**

3 Athanasios Dalakouras<sup>1,2,#</sup>, Afrodite Katsaouni<sup>1</sup>, Marianna Avramidou<sup>1</sup>, Elena  
4 Dadami<sup>1</sup>, Olga Tsiouri<sup>1</sup>, Sotirios Vasileiadis<sup>1</sup>, Athanasios Makris<sup>1</sup>, Maria Eleni  
5 Georgopoulou<sup>1</sup> and Kalliope K. Papadopoulou<sup>1,#</sup>

6

7 <sup>1</sup> University of Thessaly, Department of Biochemistry & Biotechnology,  
8 Larissa, Greece

9 <sup>2</sup> Hellenic Agricultural Organization Demeter, Institute of Industrial and  
10 Forage Crops, Larissa, Greece

11 # Corresponding author

12

13 **For correspondence:** kalpapad@bio.uth.gr, nasosdal@gmail.com

14 Athanasios Dalakouras (nasosdal@gmail.com)

15

16

17 **Highlight**

18 A root-restricted, beneficial fungal endophyte can induce systemic silencing  
19 and epigenetic modifications to its host plant.

20

21

22 **Abstract**

23 A growing body of evidence suggests that RNA interference (RNAi) plays a  
24 pivotal role in the communication between plants and pathogenic fungi,  
25 where a bi-directional cross-kingdom RNAi is established to the advantage of  
26 either the host or the pathogen. Similar mechanisms acting during plant  
27 association with non-pathogenic symbiotic microorganisms have been elusive  
28 to this date. Here, we report on an RNAi-based mechanism of  
29 communication between a beneficial fungal endophyte, *Fusarium solani* strain  
30 K (FsK) and its host plants. This soil-borne endophyte that confers resistance  
31 and/or tolerance to biotic and abiotic stress in tomato and, as shown in this  
32 study, promotes plant growth in *Nicotiana benthamiana*, is restricted to the  
33 root system in both host plants. We first showed that the fungus has a  
34 functional core RNAi machinery; double stranded RNAs (dsRNAs) are  
35 processed into short interfering RNAs (siRNAs) of predominantly 21-nt in  
36 size, which lead to the degradation of homologous mRNAs. Importantly, by  
37 using an RNAi sensor system, we demonstrated that root colonization of *N.*  
38 *benthamiana* by FsK led to the induction of systemic silencing and DNA  
39 methylation of a host reporter gene.. These data reflect a more general but  
40 so far unrecognized mechanism wherein root endophytes systemically  
41 translocate RNAi signals to the aboveground tissues of their hosts to  
42 modulate gene expression during symbiosis, which may be translated to the  
43 beneficial phenotypes.

44

45 **Keywords:** Endophytes, epigenetics, *Fusarium solani*, *Nicotiana*  
46 *benthamiana*, RNA interference, small RNAs.

## 47 **Introduction**

48 RNA interference (RNAi) is a conserved eukaryotic gene regulatory  
49 mechanism that is triggered by small RNAs (sRNAs) of approximately 20-25  
50 nucleotides (nt) (Baulcombe, 2004; Hung and Slotkin, 2021).  
51 Notwithstanding the diversity of RNAi pathways and the plethora of sRNA  
52 classes, there are essentially two types of sRNAs, the small interfering RNAs  
53 (siRNAs) and the microRNAs (miRNAs) (Borges and Martienssen, 2015;  
54 Vaucheret, 2006). In general, Dicer and Dicer-like (DCL) endonucleases  
55 cleave double stranded RNAs (dsRNAs) and stem loop hairpin RNAs (hpRNAs)  
56 into 20-25-nt siRNAs and miRNAs, respectively (Paturi and Deshmukh,  
57 2021). The occurring double stranded sRNA is then unzipped in an ATP-  
58 dependent reaction so that only one of its two strands will eventually be  
59 loaded onto an Argonaute (AGO) protein (Iwakawa and Tomari, 2022;  
60 Vaucheret, 2008). Then, the AGO-loaded sRNA scans the cytoplasm for  
61 complementary mRNA transcripts to cleave them or inhibit their translation  
62 (Brodersen *et al.*, 2008; Hamilton and Baulcombe, 1999). At least in plants,  
63 AGO-loaded sRNAs may also be transported in the nucleus, where they are  
64 involved in RNA-directed DNA methylation (RdDM) of cognate sequences  
65 (Wassenegger and Dalakouras, 2021; Wassenegger *et al.*, 1994). Moreover,  
66 in plants, nematodes and some fungi, the presence of RNA-dependent RNA  
67 polymerases (RDRs) contributes to the generation of dsRNAs from single  
68 stranded transcripts, in a process termed transitivity (de Felippes and  
69 Waterhouse, 2020; Sakurai *et al.*, 2021).

70 Fungal RNAi, initially described as 'quelling' in *Neurospora crassa*  
71 (Romano and Macino, 1992), has essentially a two-fold role. On the one  
72 hand, siRNAs generated from (usually RDR-transcribed) dsRNA precursors  
73 are involved in genome defense and maintenance of genome integrity as well  
74 as fighting against transposons, viruses and transgenes (Lax *et al.*, 2020;  
75 Torres-Martinez and Ruiz-Vazquez, 2017). On the other hand, miRNAs (also  
76 called miRNA-like, milRNAs), generated by Pol III-transcribed primary miRNA  
77 transcripts, fine-tune gene expression during vegetative and sexual

78 development besides responding to various kinds of stresses (Li *et al.*, 2010;  
79 Torres-Martinez and Ruiz-Vazquez, 2017). A growing body of recent evidence  
80 suggests that, in addition to the aforementioned roles, RNAi also has a  
81 pivotal role in the communication of fungi with their hosts. Indeed, the  
82 pathogen *Botrytis cinerea* delivers sRNAs in Arabidopsis and tomato that  
83 target members of the mitogen-activated protein kinases (MAPKs) that  
84 function in plant immunity (Weiberg *et al.*, 2013). In reverse, plants fight  
85 back; Arabidopsis and tomato deliver sRNAs in *B. cinerea* targeting the  
86 fungal DCL1 and DCL2, to attenuate fungal pathogenicity and growth (Wang  
87 *et al.*, 2016). Likewise, *Fusarium graminearum* translocates sRNAs to target  
88 defence genes in *Hordeum vulgare* and *Brachypodium distachyon* (Werner *et al.*,  
89 2021), whereas cotton plants, in response to infection with the vascular  
90 pathogen *Verticillium dahliae*, export miR159 and miR166 to silence fungal  
91 isotrichodermin C-15 hydroxylase and Ca(2+)-dependent cysteine protease,  
92 respectively, both of which are essential for fungal virulence (Zhang *et al.*,  
93 2016). However, the role of such cross-kingdom RNAi processes in  
94 mutualistic interactions remains poorly understood.

95 *Fusarium solani* strain K (FsK) is an endophytic, non-pathogenic strain,  
96 initially isolated from the roots of tomato plants (Kavroulakis *et al.*, 2007)  
97 but other plant species serve as hosts, including legumes (Skiada *et al.*,  
98 2019). FsK has been shown to protect the host against root and foliar  
99 pathogens (Kavroulakis *et al.*, 2007), spider mites (Pappas *et al.*, 2018),  
100 zoophytophagous insects (Garantonakis *et al.*, 2018) and to alleviate drought  
101 stress (Kavroulakis *et al.*, 2018). The beneficial activity of FsK presupposes  
102 an intact ethylene signaling pathway, suggesting that the fungus can induce  
103 systemic responses to the plant (Kavroulakis *et al.*, 2007). However, the  
104 exact molecular details governing this symbiosis remain largely elusive. In  
105 this study, we characterized the core RNAi machinery of FsK and provide  
106 evidence that the endophyte translocates RNAi signals to its host plant to  
107 modulate expression and induce epigenetic modification of a host reporter  
108 gene.

109

110

## 111 **Materials and Methods**

112

### 113 *Isolation of fungal conidia and inoculation.*

114 FsK was routinely cultured for 4 days in potato dextrose broth (PDB) (26 °C,  
115 160 rpm). Following removal of mycelium fragments by sieving through  
116 sterile cheesecloth, conidia were recovered from the filtrate by centrifugation  
117 at 6,500 rpm, counted using a haemocytometer and suspended in an  
118 appropriate volume of 0.85% NaCl to achieve the desired inoculum  
119 concentration. Approximately 100 conidia were used to inoculate  
120 *N.benthamiana* plants at cotyledon stage.

121

### 122 *Fungal RNA isolation.*

123 FsK was routinely cultured for 4 days in potato dextrose broth (PDB) (26 °C,  
124 160 rpm). From the occurring mycelium total RNA was isolated with TRIzol™  
125 Reagent ([www.thermofisher.com](http://www.thermofisher.com)) to be subsequently used in RT-qPCR

126 reactions. For small RNA sequencing, the enriched for small RNAs fraction  
127 was isolation from the mycelium using mirVana™ miRNA Isolation Kit  
128 (www.thermofisher.com) according to the manufacturer's instructions.

129

130 *Reverse transcriptase quantitative polymerase chain reaction (RT-qPCR).*

131 DNaseI-treated (www.thermofisher.com) RNA isolated from mycelium was  
132 quantified with by Qubit Fluorometric Quantification  
133 (www.thermofisher.com). The DNA-free RNA (10 ng) was then subjected to  
134 RT-qPCR using the the Luna® Universal Probe One-Step RT-qPCR Kit  
135 (www.neb.com) according to the manufacturer's instructions. Essentially, the  
136 total volume of the reaction was reduced to 10µl and the cycling parameters  
137 consisted of incubation at 55°C for 10 min for reverse transcription, 95°C for  
138 1 min followed by 39 cycles of 95°C for 10 sec and 60°C for 30 sec. Analysis  
139 was carried out using the geometric mean of Fsk ITS and Tef-1a transcripts  
140 (Skiada *et al.*, 2019). For Tef-1a (120 bp amplicon), the primers 5'-TCG AAC  
141 TTC CAG AGG GCA AT-3' and 5'-CCA ACA ATA GGA AGC CGC TG-3' were  
142 used. For ITS (108 bp amplicon), the primers 5'-TAG GGT AGC TGG GTC TGA  
143 CT-3' and 5'-ACC AAG TCT AAC CCG CCT AC-3' were used. For GFP (133 bp  
144 amplicon), the primers 5'-TCC CAG CAG CTG TTA CAA AC-3' and 5'-AAT ACT  
145 CCA ATT GGC GAT GG-3' were used. The relative expression of GFP gene was  
146 calculated from two to three technical replicates for every sample as  
147 described in the corresponding figure legend. Data were analyzed using the  
148 Student's two-tailed homoscedastic t-test.

149

150 *Plant and fungal DNA isolation.*

151 Genomic DNA from plant and fungal tissue was isolated with DNeasy Plant  
152 Pro (/www.qiagen.com) according to the manufacturer's instructions.

153

154 *Phylogenetic analysis.*

155 The analyzed sequences were aligned with MUSCLE v3.7 (Edgar, 2004), and  
156 informative sites were selected with Gblocks v0.91b (Talavera and

157 Castresana, 2007). The aligned selected sites were tested with the Prottest  
158 v3.2 software (Darriba et al., 2011) using the Akaike information criterion  
159 (AIC) values for optimal residue substitution model matrix selection. The LG  
160 (Le and Gascuel, 2008) residue substitution model matrix scored best for all  
161 proteins sets. The PhyML v3.0 algorithm (Guindon and Gascuel, 2003) using  
162 the LG model and bootstrap testing with 100 replicates was used for  
163 obtaining the best maximum likelihood tree.

164

#### 165 *Quantification of fungal colonization by qPCR.*

166 To estimate fungal abundance within plant tissues, absolute quantification of  
167 *F. solani* ITS gene was performed as previously described (Skiada *et al.*,  
168 2019).

#### 169 *Generation of constructs.*

170 For the generation of pCS-GFP, a PCR was performed using as template  
171 genomic DNA from *N. benthamiana* line 16C (Voinnet and Baulcombe, 1997)  
172 and the primers 5-GGT TAA CAA AGA ATG CTA ACC-3 and 5-CGA GCT CGG  
173 CAA TTC CCG ATC-3 and the occurring 2017 bp amplicon was cleaved with  
174 HpaI/SacI and ligated to a similarly cleaved pSilent-1, generating the  
175 pSilent-GFP. Next, pSilent-GFP was cleaved with PsiI/SacI and the 6663 bp  
176 fragment was ligated into the 7866 bp fragment retrieved upon ZraI/SacI  
177 cleavage of pCambia1300, generating the pCS-mGFP. For the generation of  
178 pCS-hpGF+GFP, a first PCR was performed using as template genomic DNA  
179 from *N. benthamiana* line 16C and the primers 5-acg tct cga gAT GAA GAC  
180 TAA TCT TTT TCT C-3 and 5-ACG TAA GCT TCT CTT GAA GAA GTC GTG CCG  
181 C-3 and the occurring 340 bp amplicon was cleaved with XhoI/HindIII and  
182 ligated to a similarly cleaved pSilent-1 vector, generating the pSilent-GF. A  
183 second PCR was performed using as template genomic DNA from *N.*  
184 *benthamiana* line 16C and the primers 5-acg tgg tac cAT GAA GAC TAA TCT  
185 TTT TCT C-3 and 5-ACG TAG ATC TCT CTT GAA GAA GTC GTG CCG C-3 and  
186 the occurring 340 bp amplicon was cleaved with KpnI/BglII and ligated to a  
187 similarly cleaved pSilent-GF vector, generating the pSilent-hpGF. Next, the

188 1937 bp fragment emerging upon HpaI/SacI cleavage of the pSilent-GFP was  
189 ligated into a similarly cleaved pSilent-hpGF, generating the pSilent-  
190 hpGF+GFP. Finally, pSilent-hpGF+GFP was cleaved with PsiI/SacI and the  
191 7277 bp fragment was ligated into the 7866 bp fragment retrieved upon  
192 ZraI/SacI cleavage of pCambia1300, generating the pCS-hpGF+GFP.

193

#### 194 *Agrobacterium-mediated fungal transformation.*

195 The binary vectors pCS-GFP and pCS-hpGF+GFP were used to transform  
196 *Agrobacterium tumefaciens* AGL1 strain by electroporation using the  
197 MicroPulser Electroporator ([www.bio-rad.com](http://www.bio-rad.com)) according to the  
198 manufacturer's instructions. The AGL1-pCS-GFP and AGL1-pCS-hpGF+GFP  
199 were used to transform FsK conidia as previously described (Zhang *et al.*,  
200 2015).

#### 201 *In vitro* transcription of sGFP dsRNA.

202 For the generation of the in vitro transcribed sGFP dsRNA, genomic DNA was  
203 extracted from FsK-sGFP (Sesma and Osbourn, 2004) and used as template  
204 for PCR with KAPA Taq DNA Polymerase ([www.sigmaaldrich.com](http://www.sigmaaldrich.com)) with the T7  
205 promoter-containing primers 5'-taa tac gac tca cta tag gga gaC GTA AAC  
206 GGC CAC AAG TTC AGC-3' and 5'-taa tac gac tca cta tag gga gaG TGG CGG  
207 ATC TTG AAG TTC ACC-3' (T7 promoter sequence with lowercase). The T7  
208 promoter-containing 491 bp amplicon was then used as template in the  
209 MEGAscript™ RNAi Kit ([www.thermofisher.com](http://www.thermofisher.com)) for the generation of a 445  
210 bp sGFP dsRNA.

#### 211 *In vitro* RNAi assay.

212 In 24 wells of a 96-well plate, FsK-sGFP conidia were added (in each well, 6  
213 conidia diluted in 100  $\mu$ l PDB/100). In 12 wells containing these FsK-sGFP  
214 conidia, in vitro transcribed sGFP dsRNA was added (100  $\mu$ l, 1 ng/ $\mu$ l) (dsRNA  
215 application samples). In the remaining 12 wells containing FsK-sGFP conidia,  
216 100  $\mu$ l water was added (control samples). The 96 well was covered with a  
217 removable membrane and incubated at 28° C. At timepoints 0-24-48 hpa,



218 the plate was subjected to fluorometric analysis using the using the  
219 Varioskan™ LUX multimode microplate reader ([www.thermofisher.com](http://www.thermofisher.com)).

220

#### 221 *Bisulfite sequencing.*

222 Genomic DNA from the fungus (20 ng) or the plant (100 ng) was used for  
223 bisulfite sequencing analysis using the EZ DNA Methylation-Gold Kit  
224 ([www.zymoresearch.com](http://www.zymoresearch.com)) according to the manufacturer's instructions and  
225 as previously described (Dalakouras *et al.*, 2016) . Essentially, for the cis-  
226 RdDM bisulfite analysis on FsK, the primers 5'-AAT CTC CAR TRR RTA CAC  
227 TAT TC-3' and 5'-CCT CCT TRA AAT CRA TTC CCT TAA-3' were used, whereas  
228 for the trans-RdDM bisulfite analysis on FsK and Nb-16C the primers 5'-AGT  
229 GGA GAG GGT GAA GGT GAT G-3' and 5'-CCT CCT TRA AAT CRA TTC CCT  
230 TAA-3' were used in a PCR reaction with ZymoTaq PreMix  
231 ([www.zymoresearch.com](http://www.zymoresearch.com)) according to the manufacturer's instructions. The  
232 occurring 262 bp and 311 bp amplicons for cis-RdDM and trans-RdDM,  
233 respectively, were cloned into pGEM®-T Easy Vector  
234 ([worldwide.promega.com](http://worldwide.promega.com)) and for each analysis 5-10 clones were subjected  
235 to Sanger sequencing.

236

#### 237 *Small RNA sequencing.*

238 Sequencing of small RNAs from fungal RNA (small RNA fraction) was  
239 performed by GenXPro (<https://genxpro.net/>) as previously described  
240 (Dalakouras *et al.*, 2016).

241

## 242 **Results and Discussion**

243

### 244 *FsK colonizes the root system of Nicotiana benthamiana and stimulates plant* 245 *growth.*

246 During the colonization process of its host plants, the fungus penetrates the  
247 root and grows in the root cortex and proliferates even in the vascular  
248 system of root system (Skiada *et al.*, 2019). In legumes, efficient

249 colonization by Fsk is dependent on the common symbiotic signalling  
250 pathway (Skiada *et al.*, 2020), typically used by rhizobia and arbuscular  
251 mycorrhizal fungi. Notably, although not yet explained for, fungal growth in  
252 tomato is restricted to the root system and extends only to the crown and  
253 not to the stem and leaf tissues (Kavroulakis *et al.*, 2007). Here, we  
254 investigated the capacity of Fsk to colonize another member of the  
255 Solanaceae, *Nicotiana benthamiana*, which is a widely used model plant for  
256 RNAi studies (Philips *et al.*, 2017). Similar to tomato, upon root-inoculation,  
257 the fungal endophyte colonized the root system but failed to expand to the  
258 shoot system (Figs 1a, 1b and S1). Interestingly, the Fsk-colonized plants  
259 exhibited considerably stimulated growth, at least up to 4 weeks post  
260 inoculation (wpi) when grown in both non-sterile compost (Fig. 1c) and  
261 sterile sand (Fig. S2), underpinning the beneficial effect of Fsk to this host,  
262 at least in terms of biomass production.

263

264 *Fsk encodes the core RNAi components.*

265 Despite being largely conserved among eukaryotes, not all fungi encode the  
266 core RNAi pathway; indeed, *Saccharomyces cerevisiae* lacks DCLs, AGOs and  
267 RDRs (Drinnenberg *et al.*, 2009). *Ustilago maydis* also lacks DCLs, AGOs and  
268 RDRs, in contrast, surprisingly, to its close relative *U. hordei* (Laurie *et al.*,  
269 2008). Furthermore, miRNAs have been identified in most fungal species but  
270 not in the basal fungus *Mucor circinelloides* (Torres-Martinez and Ruiz-  
271 Vazquez, 2017). Interestingly though, whereas RNAi-deficient mutants of  
272 most ascomycetes and basidiomycetes are not impaired in vegetative  
273 growth and development, sexual differentiation and response to stress, *M.*  
274 *circinelloides* is (Ruiz-Vazquez *et al.*, 2015). These being said, the  
275 mechanistic details and role of RNAi in fungal kingdom can be unusually  
276 diverse.

277 To examine whether Fsk encodes the core RNAi machinery, we  
278 performed transcriptome-validated genome annotation (BioProject  
279 PRJNA796177, Tsiouri and Papadopoulou, unpublished results) and identified

280 two DCLs (FskDCL1 and FskDCL2), two AGOs (FskAGO1 and FskAGO2) and  
281 four RDRs (FskRDR1-4) (Fig. 2a). FskDCL1 and FskDCL2 contain the Dicer-  
282 like protein structures with a Dead-like helicases superfamily domain box  
283 (DEXDc) box, a helicase superfamily c-terminal domain (HELICc), and two  
284 ribonuclease III domains (RIBOc) responsible for the cleavage of dsRNA  
285 precursors into sRNAs (Paturi and Deshmukh, 2021). Both FskAGO1 and  
286 FskAGO2 proteins contain PAZ and PIWI domains; PAZ recognizes the 3' end  
287 of sRNAs while PIWI exhibits an RNaseH-like endonucleolytic activity and  
288 mediates target cleavage (Wu *et al.*, 2020). All four FskRDRs contain the  
289 RdRP/RDR domain, which is highly conserved in fungi (Chen *et al.*, 2015).  
290 FskRDR2 and FskRDR3 contain the DLDGD motif, which is often encountered  
291 in plants, whereas FskRDR1 and FskRDR4 contain the DYDGD motif, which is  
292 more common in fungi (Wassenegger and Krczal, 2006). To explore the  
293 molecular evolution of these proteins, we performed phylogenetic analyses of  
294 DCL, AGO and RDR proteins including *Fusarium graminearum* and  
295 *Neurospora crassa* (Fig. 2b). Our analysis showed that FskDCL1 is related to  
296 FgDCL1 and NcDCL1 that function in the meiotic silencing by unpaired DNA  
297 (MSUD) pathway (Fig. 2b) (Alexander *et al.*, 2008), whereas FskDCL2 is  
298 closer to FgDCL2 and NcDCL2 which have a prominent role in RNAi by  
299 processing of dsRNAs into siRNAs (Chen *et al.*, 2015). FskAGO1 is closely  
300 related to FgAGO1 and NcQDE2 that are loaded with dsRNA-processed  
301 siRNAs during RNAi, whereas FskAGO2 is closer to FgAGO2 and the *N. crassa*  
302 SMS2 that are involved in MSUD (Lee *et al.*, 2003). Of note, FskRDR4 is  
303 closely related to NcQDE1 which is essential for quelling and suggested to be  
304 functionally related to plant RDR6 (Wassenegger and Krczal, 2006).

305

306 *Fsk takes up RNAi molecules from its environment.*

307 In order to test the functionality of Fsk's RNAi machinery, an *in vitro*-  
308 transcribed 445 bp sGFP dsRNA was applied to a sGFP-expressing Fsk, sGFP  
309 being a GFP variant that contains a serine-to-threonine substitution at amino  
310 acid 65, optimized for use in fungi (Sesma and Osbourn, 2004) (Figs 3a, 3b).

311 Fluorometric analysis revealed that the sGFP expression levels dropped to  
312 almost 50% 24 hours post application (hpa) (Fig. 3c). These data suggested  
313 that the externally applied dsRNA was processed by fungal DCLs into siRNAs  
314 that were loaded onto fungal AGOs to mediate cleavage of the sGFP mRNA.  
315 However, no further decrease of sGFP levels could be observed at later  
316 timepoints (48 hpa), reminiscent of similar observations in *F. asiaticum*  
317 (Song *et al.*, 2018) and implying the absence an active RDR-mediated self-  
318 reinforcing mechanism of RNAi that could ensure ongoing RNAi even at the  
319 absence/degradation of the initial dsRNA input.

320 Overall, these data suggest not only that the RNAi machinery in FsK is  
321 functional but also that FsK is able to take up RNAi molecules from its  
322 environment. Not all fungi are able to take up RNA molecules from their  
323 environment; *Colletotrichum gloesporioides*, *Trichoderma virens* and  
324 *Phytophthora infestans* being some notable examples that fail to do so (Qiao  
325 *et al.*, 2021). Of note, fungi that are indeed able to receive RNAi molecules  
326 from their environment are not only promising candidates for RNAi-based  
327 fungicidal control (Šečić and Kogel, 2021) but also likely partners in an RNAi-  
328 based cross-kingdom communication with their host (He *et al.*, 2021).

329

330 *FsK processes hairpin RNA transcripts into siRNAs that trigger mRNA*  
331 *degradation but not DNA methylation in the fungal hyphae.*

332 In order to examine the mode of dsRNA processing in the endophyte, FsK  
333 was transformed with a transgene comprised of a full length green  
334 fluorescent protein (GFP) corresponding to mGFP5-ER (Haseloff and  
335 Siemering, 2006) and a hairpin (hp) construct of the first 332 bp of GFP  
336 (hpGF) (Fig. 4a). In this setup, the hpGF locus served as the RNAi-trigger  
337 while the GFP locus as the RNAi-target. Small RNA sequencing (sRNA-seq) in  
338 three independent FsK-hpGF+GFP transformants (#6, #7, #27) revealed the  
339 accumulation of GF siRNAs (perfectly matching the GF region) having  
340 variable sizes from 18-30 nt but predominantly of 21-nt, 22-nt and 24-nt  
341 (Figs 4b, 4c and S3). This finding was reminiscent of the situation in plants,

342 where hpRNAs are typically processed by DCLs to 21-, 22- and 24-nt siRNAs  
343 (Fusaro *et al.*, 2006). To the best of our knowledge, similar sRNA-seq studies  
344 in fungi, aiming to reveal the mode of processing of a specific hpRNA/dsRNA,  
345 are absent; yet, genome-wide sRNA-seq studies (identifying siRNAs, miRNAs  
346 but also DCL-independent sRNAs) reveal a remarkably diverse pattern, with  
347 prominent size classes ranging from 19-22-nt in *Penicillium chrysogenum*  
348 (Dahlmann and Kück, 2015), to 22-25-nt in *S. pombe* (Djupedal *et al.*, 2009)  
349 and 27-28-nt in *F. graminearum* (Chen *et al.*, 2015). Our analysis does not  
350 allow us to identify whether all sRNA size classes are actual DCL products  
351 (e.g., they could represent degradation products) or whether they all exhibit  
352 biological activity. Yet, it is reasonable to assume that FskDCL2 generated  
353 the bulk of sRNAs (Chen *et al.*, 2015), of which the most prominent size class  
354 (21-nt) seems to undertake the major burden for RNAi activity.

355 To evaluate this RNAi activity, we measured the GF siRNA-mediated  
356 downregulation of GFP mRNA in three independent Fsk-hpGF+GFP  
357 transformants (#6, #7, #27) when compared to Fsk-GFP (transformed with  
358 a cassette lacking the hpGF transgene) (Fig. 4a). Indeed, GFP expression  
359 was virtually eliminated in all Fsk-hpGF+GFP transformants (Figure 3D). Of  
360 note, we detected GF siRNAs but no or negligible P siRNAs that could had  
361 potentially emerged upon the FskRDR processing on the GF siRNA-targeted  
362 GFP transcript (Figure 4b). This is in contrast to the situation in plants (de  
363 Felippes and Waterhouse, 2020) but in agreement with similar reports in *F.*  
364 *asiaticum* (Song *et al.*, 2018), suggesting the absence of an active RDR-  
365 based mechanism in Fsk.

366 Typically, the onset of RNAi and the accumulation of siRNAs leads to  
367 RdDM in plants (Dalakouras and Vlachostergios, 2021). DNA methylation also  
368 occurs in some, but not all, fungi, and usually in repetitive sequences  
369 (Bewick *et al.*, 2019). Yet, such DNA methylation is considered to be  
370 dispensable of RNAi molecules, thus fungi have been considered to lack a  
371 *bona fide* RdDM mechanism (Nai *et al.*, 2020). Nevertheless, recent advances  
372 challenge this assumption; indeed, sRNA-dependent RdDM-like phenomena

373 has been detected, at least in *Pleurotus tuoliensis* and *P. eryngii* var. *eryngii*  
374 (Basidiomycetes) (Zhang *et al.*, 2018) and *Puccinia graminis* (Ascomycetes)  
375 (Sperschneider *et al.*, 2021). Accordingly, and given the abundant  
376 accumulation of GF siRNAs in FsK-hpGF+GFP, we were interested to see  
377 whether they could trigger RdDM of cognate DNA sequences. To analyze cis-  
378 RdDM (at the locus generating the siRNAs), we chose a 262 bp fragment of  
379 the hpGF transgene (Fig. 4a). For trans-RdDM (at a locus that does not  
380 generate siRNAs but is homologous to them), we chose a 311 bp fragment of  
381 the GFP transgene (Fig. 4a). Whereas CG and CHG methylation can be  
382 maintained in an RNAi-independent manner (Law and Jacobsen, 2010), CHH  
383 methylation is the hallmark of ongoing de novo RdDM (Pelissier *et al.*, 1999),  
384 and both cis and trans fragments under analysis were rich in asymmetric  
385 CHH context (80% for cis and 72% for trans) (Figs 4e, 4f). However, bisulfite  
386 sequencing revealed the absence of methylated cytosines in any sequence  
387 context (CG, CHG, CHH), at neither cis (Fig. 4e) nor trans (Fig. 4f) loci,  
388 suggesting that no RdDM takes place in FsK, at least in our experimental  
389 setup. It has been suggested that fungal proteins with de novo  
390 methyltransferase (DNMT) and/or helicase-like Snf2 family domains may be  
391 involved in RdDM-like pathways in fungi (Nai *et al.*, 2020). However, we  
392 were unable to detect such genes in the FsK genome, underpinning the  
393 conclusions obtained from bisulfite sequencing about the absence of an  
394 active RdDM mechanism in FsK.

395

396 *FsK translocates RNAi signals to its host to induce systemic RNAi and*  
397 *epigenetic changes of a reporter gene.*

398 Establishment of mutualistic associations between fungi and their host  
399 requires genetic and epigenetic reprogramming as well as metabolome  
400 modulation of both by the exchange of effector molecules (Kloppholz *et al.*,  
401 2011). Indeed, RdDM is essential in *Arabidopsis* to establish a beneficial  
402 relationship with the root-colonizing *Trichoderma atroviride* while DNA  
403 methylation and histone modifications are required for plant priming by the

404 beneficial fungus against *B. cinerea* (Rebolledo-Prudencio *et al.*, 2021).  
405 Importantly, it was just recently shown that during the mutualistic interaction  
406 of the ectomycorrhizal fungus *Pisolithus microcarpus* with *Eucalyptus grandis*,  
407 a fungal miRNA, Pmic\_miR-8, targets the host NB-ARC domain containing  
408 transcripts in a cross-kingdom RNAi manner (Wong-Bajracharya *et al.*,  
409 2022). Reminiscent of this, an in silico study predicted that the beneficial  
410 arbuscular mycorrhizal fungi *Rhizophagus irregularis* produces sRNAs that  
411 have 237 candidate targets in the host plant *Medicago truncatula*, including  
412 specific mRNAs known to be modulated in roots upon AMF colonization  
413 (Silvestri *et al.*, 2019). Similarly, a recent study based on transcriptome and  
414 sRNA profile change analysis during the onset of the mutualistic interaction  
415 between the beneficial root endophyte *Serendipita indica* with its host  
416 *Brachypodium distachyon*, suggested that interaction-induced sRNAs in both  
417 organisms may underlie reciprocal targeting of genes related to plant  
418 development and fungal growth and nutrient acquisition (Secic *et al.*, 2021).  
419 Thus, it is very likely that, similar to fungal pathogens (Cai *et al.*, 2019),  
420 beneficial fungal endophytes also display an RNA-based communication with  
421 their hosts. However, clear evidence of actual RNAi molecule translocation  
422 and concomitant cross-kingdom RNAi between a beneficial fungal endophyte  
423 and its host has been lacking to this date.

424 In order to address this question, we resorted to the GFP-expressing  
425 *N. benthamiana* plant line 16C (Nb-GFP) (Voinnet and Baulcombe, 1997), as  
426 an RNAi sensor system. Nb-GFP carries a 35S-driven mGF5-ER transgene  
427 (Fig. 5a) and is a well-studied RNAi model plant that allows the monitoring of  
428 systemic RNAi (i.e. spreading of RNAi to tissues other than those where RNAi  
429 initially occurred) by observation of the presence or abolishment of GFP  
430 expression under ultraviolet light. When Nb-GFP plants were inoculated with  
431 FsK-hpGF+GFP (Fig. 5a), we could record the following outcomes: (i) no  
432 visible RNAi (45% of the plants, 6 wpi), (ii) spot-like RNAi (45% of the  
433 plants, 4 wpi), (iii) vein-restricted RNAi (5% of the plants, 4 wpi) and (iv)  
434 full-tissue RNAi (5% of the plants, 4 wpi) (Fig. 5b). Colonization of Nb-GFP

435 plants with non-transformed FsK and/or FsK-sGFP failed to trigger any visible  
436 RNAi phenotype even after 10 wpi, suggesting that not the mere presence of  
437 the endophyte but the RNAi molecules it expresses are responsible for the  
438 induction of RNAi phenotypes in its host.

439 RNAi in plants is tightly coupled to RdDM (Dalakouras and  
440 Vlachostergios, 2021; Jones *et al.*, 1999). Accordingly, bisulfite sequencing  
441 analysis of leaf and root tissues from the fully silenced Nb-GFP plants  
442 disclosed the dense (100%) onset of DNA methylation in the GFP region (Fig.  
443 5a) in every sequence context: CG, CHG and CHH (Fig. 5c). Overall, these  
444 data clearly show that the endophyte triggered not only mRNA degradation  
445 but also DNA methylation of a host reporter gene. We favor the scenario that  
446 FsK-hpGF+GFP translocated RNAi signals (dsRNAs but most likely siRNAs) to  
447 the roots of Nb-GFP initiating local RNAi of the host GFP. Importantly, once  
448 present in the plant cells and upon targeting the host GFP transcript for  
449 silencing, these endophyte-derived primary siRNAs culminated in the  
450 generation of host-derived RDR-mediated secondary siRNAs (as implied by  
451 the RdDM pattern, see below). Whether the recorded RdDM in the root  
452 tissues was induced by the endophyte-derived primary or the host-derived  
453 secondary siRNAs is not clear. Yet, the fact that RdDM could be detected not  
454 only in the GF but also in the P region (Figure 5a, 311 bp bisulfite fragment  
455 covering both GF and P regions) strongly implies in favor of transitive host-  
456 derived secondary siRNAs imposing RdDM. Now, siRNAs are mobile moieties;  
457 they can move cell-to-cell through the plasmodesmata and through the  
458 vasculature to distant parts of the plant (Voinnet, 2022; Voinnet and  
459 Baulcombe, 1997). The establishment of systemic silencing in the upper  
460 parts of the plant (which FsK fails to colonize, Fig. 1) suggests that mobile  
461 siRNA signals from the root entered the phloem to reach shoot tissues. Most  
462 likely both endophyte-derived primary siRNAs and host-derived secondary  
463 siRNAs could have played the role of the mobile systemic signal (Devers *et al.*,  
464 2020). However, it is unlikely that the mere presence of endophyte-  
465 derived primary siRNAs alone could trigger systemic silencing; it rather



466 seems that a certain quantitative siRNA threshold needs to be surpassed for  
467 the onset of systemic silencing (Kalantidis *et al.*, 2006), rendering the  
468 abundant presence of host-derived secondary siRNAs indispensable.  
469 Importantly, establishment of systemic RNA in the receiving tissues requires  
470 RDR6 (Schwach *et al.*, 2005). Thus, in the receiving tissues, the  
471 primary/secondary siRNAs triggered a RDR6-mediated generation of (host-  
472 derived) tertiary siRNAs, ensuring the efficient establishment of GFP mRNA  
473 degradation and DNA methylation.

474

475 *Conclusion.*

476 Here, we have characterized the RNAi core machinery of a fungal endophyte  
477 and we provide solid evidence that it translocates RNAi signals to its host to  
478 trigger systemic silencing and epigenetic modifications. To prove the concept,  
479 we have employed an artificial RNAi sensor system; future studies coupling  
480 sRNAome, degradome and methylome analysis will be required to pinpoint  
481 the nature of the endogenous fungal sRNAs (siRNAs and/or miRNAs) that are  
482 translocated to the host, which host genes are targeted for transcriptional  
483 and/or post-transcriptional silencing and how this process is ultimately  
484 translated into a beneficial phenotype. Our data may well reflect a so far  
485 unrecognized pathway according to which endophytes establish the symbiosis  
486 and/or impose their beneficial impact by translocating RNA molecules that  
487 modulate host gene expression and affect the epigenome's plasticity. RNAi-  
488 mediated communication between plants and their interacting organisms is  
489 much more widespread than previously thought and may account for the  
490 improved plant performance often observed in the presence of certain  
491 associated microbiota.

492 **Supplementary Data.**

493 The following supplementary data are available at JXB online.

494 Fig. S1. Colonization of FsK-sGFP in Nb-WT and stereoscopic observation of  
495 sGFP fluorescence in various tissues

496 Fig. S2. Impact of FsK colonization of Nb-WT plants grown in sterile sand in  
497 magenta boxes.

498 Fig. S3. Small RNA sequencing in three FsK-hpGF+GFP transformants. (a)  
499 Mapping of sRNAs in GFP. (b) Size distribution of GFP sRNAs.

500 Fig. S4. Systemic silencing phenotypes upon colonization of FsK-GF+GFP in  
501 Nb-GFP plants 4-6 wpi.

502

503 **Acknowledgments**

504 This work was supported by funds from the EU Horizon 2020 Marie

505 Skłodowska-Curie fellowship (RNASTIP, Grant ID 793186) and the EU

506 Horizon 2020 PRIMA program (INTOMED, Grant ID 1534).

507 **Conflict of interest**

508 *Fusarium solani* FsK is patented (20070100563/1006119, issued by the  
509 Industrial Property Organization to KKP).

510 **Author Contributions**

511 A.D. and K.K.P. designed research; A.D., A.K., M.A., E.D., A.M. M.G. and

512 E.D., performed research; A.D., O.T., S.V. and KKP analyzed data; A.D. and

513 K.P.P. wrote the paper. All authors reviewed and approved the manuscript.

514 **Data availability**

515 All sequencing data supporting the findings of this study are deposited to

516 Zenodo (<https://doi.org/10.5281/zenodo.6088855>)

## 517 **References**

- 518 **Alexander WG, Raju NB, Xiao H, Hammond TM, Perdue TD,**  
519 **Metzenberg RL, Pukkila PJ, Shiu PKT.** 2008. DCL-1 colocalizes with other  
520 components of the MSUD machinery and is required for silencing. *Fungal*  
521 *genetics and biology : FG & B* **45** **5**, 719-727.
- 522 **Baulcombe D.** 2004. RNA silencing in plants. *Nature* **431**, 356-363.
- 523 **Bewick AJ, Hofmeister BT, Powers RA, Mondo SJ, Grigoriev IV, James**  
524 **TY, Stajich JE, Schmitz RJ.** 2019. Diversity of cytosine methylation across  
525 the fungal tree of life. *Nature Ecology & Evolution* **3**, 479-490.
- 526 **Bolger AM, Lohse M, Usadel B.** 2014. Trimmomatic: A flexible trimmer for  
527 Illumina Sequence Data. *Bioinformatics* **30**, 2114-2120.
- 528 **Borges F, Martienssen RA.** 2015. The expanding world of small RNAs in  
529 plants. *Nature Reviews Molecular Cell Biology* **16**, 727-741.
- 530 **Borodovsky M, Mills R, Besemer J, Lomsadze A.** 2002. Prokaryotic gene  
531 prediction using GeneMark and GeneMark.hmm. *Current Protocols in*  
532 *Bioinformatics*.
- 533 **Brodersen P, Sakvarelidze-Achard L, Bruun-Rasmussen M, Dunoyer P,**  
534 **Yamamoto YY, Sieburth L, Voinnet O.** 2008. Widespread translational  
535 inhibition by plant miRNAs and siRNAs. *Science* **320**, 1185-1190.
- 536 **Cai Q, He B, Jin H.** 2019. A safe ride in extracellular vesicles - small RNA  
537 trafficking between plant hosts and pathogens. *Curr Opin Plant Biol* **52**, 140-  
538 148.
- 539 **Cantalapiedra CP, Hernández-Plaza A, Letunic I, Bork P, Huerta-**  
540 **Cepas J.** 2021. eggNOG-mapper v2: Functional Annotation, Orthology  
541 Assignments, and Domain Prediction at the Metagenomic Scale. *Molecular*  
542 *Biology and Evolution* **38**, 5825-5829.
- 543 **Chen Y, Gao Q, Huang M, Liu Y, Liu Z, Liu X, Ma Z.** 2015.  
544 Characterization of RNA silencing components in the plant pathogenic fungus  
545 *Fusarium graminearum*. *Sci Rep* **5**, 12500.
- 546 **Dahlmann TA, Kück U.** 2015. Dicer-Dependent Biogenesis of Small RNAs  
547 and Evidence for MicroRNA-Like RNAs in the Penicillin Producing Fungus  
548 *Penicillium chrysogenum*. *PLoS One* **10**, e0125989.
- 549 **Dalakouras A, Dadami E, Wassenegger M, Krczal G, Wassenegger M.**  
550 2016. RNA-directed DNA methylation efficiency depends on trigger and  
551 target sequence identity. *Plant J* **87**, 202-214.
- 552 **Dalakouras A, Vlachostergios D.** 2021. Epigenetic approaches to crop  
553 breeding: current status and perspectives. *Journal of Experimental Botany*  
554 **72**, 5356-5371.
- 555 **Darriba D, Taboada GL, Doallo R, Posada D.** 2011. ProtTest 3: fast  
556 selection of best-fit models of protein evolution. *Bioinformatics* **27**, 1164-  
557 1165.
- 558 **de Felippes FF, Waterhouse PM.** 2020. The Whys and Wherefores of  
559 Transitivity in Plants. *Frontiers in Plant Science* **11**.
- 560 **Devers EA, Brosnan CA, Sarazin A, Albertini D, Amsler AC, Brioudes F,**  
561 **Jullien PE, Lim P, Schott G, Voinnet O.** 2020. Movement and differential

562 consumption of short interfering RNA duplexes underlie mobile RNA  
563 interference. *Nat Plants* **6**, 789-799.

564 **Djupedal I, Kos-Braun IC, Mosher RA, Söderholm N, Simmer F,**  
565 **Hardcastle TJ, Fender A, Heidrich N, Kagansky A, Bayne E, Wagner**  
566 **EGH, Baulcombe DC, Allshire RC, Ekwall K.** 2009. Analysis of small RNA  
567 in fission yeast; centromeric siRNAs are potentially generated through a  
568 structured RNA. *The EMBO journal* **28**, 3832-3844.

569 **Dobin A, Davis CA, Schlesinger F, Drenkow J, Zaleski C, Jha S.** 2013.  
570 STAR: ultrafast universal RNA-seq aligner. *Bioinformatics* **29**, 15-29.

571 **Drinnenberg IA, Weinberg DE, Xie KT, Mower JP, Wolfe KH, Fink GR,**  
572 **Bartel DP.** 2009. RNAi in budding yeast. *Science* **326**, 544-550.

573 **Edgar RC.** 2004. MUSCLE: a multiple sequence alignment method with  
574 reduced time and space complexity. *BMC Bioinformatics* **5**, 113.

575 **Fusaro AF, Matthew L, Smith NA, Curtin SJ, Dedic-Hagan J, Ellacott**  
576 **GA, Watson JM, Wang MB, Brosnan C, Carroll BJ, Waterhouse PM.**  
577 2006. RNA interference-inducing hairpin RNAs in plants act through the viral  
578 defence pathway. *EMBO Rep* **7**, 1168-1175.

579 **Garantonakis N, Pappas ML, Varikou K, Skiada V, Broufas GD,**  
580 **Kavroulakis N, Papadopoulou KK.** 2018. Tomato Inoculation With the  
581 Endophytic Strain *Fusarium solani* K Results in Reduced Feeding Damage by  
582 the Zoophytophagous Predator *Nesidiocoris tenuis*. *Frontiers in Ecology and*  
583 *Evolution* **6**.

584 **Grabherr MG, Haas BJ, Yassour M, Levin JZ, Thompson DA, Amit I.**  
585 2011. Full-length transcriptome assembly from RNA-seq data without a  
586 reference genome. *Nature Biotechnology* **29**.

587 **Guindon Sp, Gascuel O.** 2003. A simple, fast, and accurate algorithm to  
588 estimate large phylogenies by maximum likelihood. *Systematic Biology* **52**,  
589 696-704.

590 **Hamilton AJ, Baulcombe DC.** 1999. A species of small antisense RNA in  
591 posttranscriptional gene silencing in plants. *Science* **286**, 950-952.

592 **Haseloff J, Siemering KR.** 2006. The uses of green fluorescent protein in  
593 plants. *Methods Biochem Anal* **47**, 259-284.

594 **He B, Hamby R, Jin H.** 2021. Plant extracellular vesicles: Trojan horses of  
595 cross-kingdom warfare. *FASEB Bioadv* **3**, 657-664.

596 **Hung Y-H, Slotkin RK.** 2021. The initiation of RNA interference (RNAi) in  
597 plants. *Current Opinion in Plant Biology* **61**, 102014.

598 **Istace B, Friedrich A, d'Agata L, Faye S, Payen E, Beluche O, Caradec**  
599 **C, Davidas S, Cruaud C, Liti G, Lemainque A, Engelen S, Wincker P,**  
600 **Schacherer J, Aury J-M.** 2017. de novo assembly and population genomic  
601 survey of natural yeast isolates with the Oxford Nanopore MinION sequencer.  
602 *GigaScience* **6**, 1-13.

603 **Iwakawa HO, Tomari Y.** 2022. Life of RISC: Formation, action, and  
604 degradation of RNA-induced silencing complex. *Mol Cell* **82**, 30-43.

605 **Jones L, Hamilton AJ, Voinnet O, Thomas CL, Maule AJ, Baulcombe**  
606 **DC.** 1999. RNA-DNA interactions and DNA methylation in post-transcriptional  
607 gene silencing. *Plant Cell* **11**, 2291-2301.

- 608 **Kalantidis K, Tsagris M, Tabler M.** 2006. Spontaneous short-range  
609 silencing of a GFP transgene in *Nicotiana benthamiana* is possibly mediated  
610 by small quantities of siRNA that do not trigger systemic silencing. *Plant J*  
611 **45**, 1006-1016.
- 612 **Kavroulakis N, Doupis G, Papadakis IE, Ehaliotis C, Papadopoulou KK.**  
613 2018. Tolerance of tomato plants to water stress is improved by the root  
614 endophyte *Fusarium solani* FsK. *Rhizosphere* **6**, 77-85.
- 615 **Kavroulakis N, Ntougias S, Zervakis GI, Ehaliotis C, Haralampidis K,**  
616 **Papadopoulou KK.** 2007. Role of ethylene in the protection of tomato  
617 plants against soil-borne fungal pathogens conferred by an endophytic  
618 *Fusarium solani* strain. *J Exp Bot* **58**, 3853-3864.
- 619 **Kloppholz S, Kuhn H, Requena N.** 2011. A secreted fungal effector of  
620 *Glomus intraradices* promotes symbiotic biotrophy. *Curr Biol* **21**, 1204-1209.
- 621 **Laurie JD, Linning R, Bakkeren G.** 2008. Hallmarks of RNA silencing are  
622 found in the smut fungus *Ustilago hordei* but not in its close relative *Ustilago*  
623 *maydis*. *Curr Genet* **53**, 49-58.
- 624 **Law JA, Jacobsen SE.** 2010. Establishing, maintaining and modifying DNA  
625 methylation patterns in plants and animals. *Nat Rev Genet* **11**, 204-220.
- 626 **Lax C, Tahiri G, Patiño-Medina JA, Cánovas-Márquez JT, Pérez-Ruiz**  
627 **JA, Osorio-Concepción M, Navarro E, Calo S.** 2020. The Evolutionary  
628 Significance of RNAi in the Fungal Kingdom. *Int J Mol Sci* **21**.
- 629 **Le SQ, Gascuel O.** 2008. An improved general amino acid replacement  
630 matrix. *Molecular Biology and Evolution* **25**, 1307-1320.
- 631 **Lee DW, Pratt RJ, McLaughlin M, Aramayo R.** 2003. An argonaute-like  
632 protein is required for meiotic silencing. *Genetics* **164**, 821-828.
- 633 **Li L, Chang SS, Liu Y.** 2010. RNA interference pathways in filamentous  
634 fungi. *Cell Mol Life Sci* **67**, 3849-3863.
- 635 **Milne I, Stephen G, Bayer M, Cock PJ, Pritchard L, Cardle L, Shaw PD,**  
636 **Marshall D.** 2013. Using Tablet for visual exploration of second-generation  
637 sequencing data. *Brief Bioinform* **14**, 193-202.
- 638 **Nai YS, Huang YC, Yen MR, Chen PY.** 2020. Diversity of Fungal DNA  
639 Methyltransferases and Their Association With DNA Methylation Patterns.  
640 *Front Microbiol* **11**, 616922.
- 641 **Palmer JM, Stajich JE.** 2020. Funannotate v1.8.1: Eukaryotic genome  
642 annotation.
- 643 **Pappas ML, Liapoura M, Papantoniou D, Avramidou M, Kavroulakis N,**  
644 **Weinhold A, Broufas GD, Papadopoulou KK.** 2018. The Beneficial  
645 Endophytic Fungus *Fusarium solani* Strain K Alters Tomato Responses  
646 Against Spider Mites to the Benefit of the Plant. *Front Plant Sci* **9**, 1603.
- 647 **Paturi S, Deshmukh MV.** 2021. A Glimpse of "Dicer Biology" Through the  
648 Structural and Functional Perspective. *Front Mol Biosci* **8**, 643657.
- 649 **Pelissier T, Thalmeir S, Kempe D, Sanger HL, Wassenegger M.** 1999.  
650 Heavy de novo methylation at symmetrical and non-symmetrical sites is a  
651 hallmark of RNA-directed DNA methylation. *Nucleic Acids Res* **27**, 1625-  
652 1634.

- 653 **Philips JG, Naim F, Lorenc MT, Dudley KJ, Hellens RP, Waterhouse**  
654 **PM.** 2017. The widely used *Nicotiana benthamiana* 16c line has an unusual  
655 T-DNA integration pattern including a transposon sequence. *PLoS One* **12**,  
656 e0171311.
- 657 **Prjibelski A, Antipov D, Meleshko D, Lapidus A, Korobeynikov A.** 2020.  
658 Using SPAdes De Novo Assembler. *Current Protocols in Bioinformatics* **70**,  
659 e102.
- 660 **Qiao L, Lan C, Capriotti L, Ah-Fong A, Nino Sanchez J, Hamby R,**  
661 **Heller J, Zhao H, Glass NL, Judelson HS, Mezzetti B, Niu D, Jin H.**  
662 2021. Spray-induced gene silencing for disease control is dependent on the  
663 efficiency of pathogen RNA uptake. *Plant Biotechnology Journal* **19**, 1756-  
664 1768.
- 665 **Rebolledo-Prudencio OG, Estrada-Rivera M, Dautt-Castro M, Arteaga-**  
666 **Vazquez MA, Arenas-Huertero C, Rosendo-Vargas MM, Jin H, Casas-**  
667 **Flores S.** 2021. The small RNA-mediated gene silencing machinery is  
668 required in *Arabidopsis* for stimulation of growth, systemic disease  
669 resistance, and suppression of the nitrile-specifier gene NSP4 by *Trichoderma*  
670 *atroviride*. *Plant J.*
- 671 **Ren J, Wen L, Gao X, Jin C, Xue Y, Yao X.** 2009. DOG 1.0: illustrator of  
672 protein domain structures. *Cell Res* **19**, 271-273.
- 673 **Romano N, Macino G.** 1992. Quelling: transient inactivation of gene  
674 expression in *Neurospora crassa* by transformation with homologous  
675 sequences. *Mol Microbiol* **6**, 3343-3353.
- 676 **Ruiz-Vazquez RM, Nicolas FE, Torres-Martinez S, Garre V.** 2015.  
677 Distinct RNAi Pathways in the Regulation of Physiology and Development in  
678 the Fungus *Mucor circinelloides*. *Adv Genet* **91**, 55-102.
- 679 **Sakurai Y, Baeg K, Lam AYW, Shoji K, Tomari Y, Iwakawa H-o.** 2021.  
680 Cell-free reconstitution reveals the molecular mechanisms for the initiation of  
681 secondary siRNA biogenesis in plants. *Proceedings of the National Academy*  
682 *of Sciences* **118**, e2102889118.
- 683 **Schwach F, Vaistij FE, Jones L, Baulcombe DC.** 2005. An RNA-dependent  
684 RNA polymerase prevents meristem invasion by potato virus X and is  
685 required for the activity but not the production of a systemic silencing signal.  
686 *Plant Physiol* **138**, 1842-1852.
- 687 **Šečić E, Kogel KH.** 2021. Requirements for fungal uptake of dsRNA and  
688 gene silencing in RNAi-based crop protection strategies. *Curr Opin Biotechnol*  
689 **70**, 136-142.
- 690 **Secic E, Zanini S, Wibberg D, Jelonek L, Busche T, Kalinowski J, Nasfi**  
691 **S, Thielmann J, Imani J, Steinbrenner J, Kogel KH.** 2021. A novel plant-  
692 fungal association reveals fundamental sRNA and gene expression  
693 reprogramming at the onset of symbiosis. *BMC Biol* **19**, 171.
- 694 **Sesma A, Osbourn AE.** 2004. The rice leaf blast pathogen undergoes  
695 developmental processes typical of root-infecting fungi. *Nature* **431**, 582-  
696 586.
- 697 **Silvestri A, Fiorilli V, Miozzi L, Accotto GP, Turina M, Lanfranco L.**  
698 2019. In silico analysis of fungal small RNA accumulation reveals putative

699 plant mRNA targets in the symbiosis between an arbuscular mycorrhizal  
700 fungus and its host plant. *BMC Genomics* **20**, 169.

701 **Skiada V, Avramidou M, Bonfante P, Genre A, Papadopoulou KK.** 2020.  
702 An endophytic *Fusarium*-legume association is partially dependent on the  
703 common symbiotic signalling pathway. *New Phytol* **226**, 1429-1444.

704 **Skiada V, Faccio A, Kavroulakis N, Genre A, Bonfante P,**  
705 **Papadopoulou KK.** 2019. Colonization of legumes by an endophytic  
706 *Fusarium solani* strain Fsk reveals common features to symbionts or  
707 pathogens. *Fungal Genet Biol* **127**, 60-74.

708 **Song XS, Gu KX, Duan XX, Xiao XM, Hou YP, Duan YB, Wang JX, Yu N,**  
709 **Zhou MG.** 2018. Secondary amplification of siRNA machinery limits the  
710 application of spray-induced gene silencing. *Mol Plant Pathol* **19**, 2543-2560.

711 **Sperschneider J, Jones AW, Nasim J, Xu B, Jacques S, Zhong C,**  
712 **Upadhyaya NM, Mago R, Hu Y, Figueroa M, Singh KB, Stone EA,**  
713 **Schwessinger B, Wang M-B, Taylor JM, Dodds PN.** 2021. The stem rust  
714 fungus *Puccinia graminis* f. sp. *tritici* induces centromeric small RNAs during  
715 late infection that are associated with genome-wide DNA methylation. *BMC*  
716 *Biology* **19**, 203.

717 **Stanke M, Keller O, Gunduz I, Hayes A, Waack S, Morgenstern B.**  
718 2006. AUGUSTUS: ab initio prediction of alternative transcripts. *Nucleic Acids*  
719 *Research* **34**.

720 **Talavera G, Castresana J.** 2007. Improvement of phylogenies after  
721 removing divergent and ambiguously aligned blocks from protein sequence  
722 alignments. *Systematic Biology* **56**, 564-577.

723 **Torres-Martinez S, Ruiz-Vazquez RM.** 2017. The RNAi Universe in Fungi:  
724 A Varied Landscape of Small RNAs and Biological Functions. *Annu Rev*  
725 *Microbiol* **71**, 371-391.

726 **Vaucheret H.** 2006. Post-transcriptional small RNA pathways in plants:  
727 mechanisms and regulations. *Genes Dev* **20**, 759-771.

728 **Vaucheret H.** 2008. Plant ARGONAUTES. *Trends Plant Sci* **13**, 350-358.

729 **Voinnet O.** 2022. Revisiting small RNA movement in plants. *Nat Rev Mol Cell*  
730 *Biol*.

731 **Voinnet O, Baulcombe DC.** 1997. Systemic signalling in gene silencing.  
732 *Nature* **389**, 553.

733 **Walker BJ, Abeel T, Shea T, Priest M, Abouelliel A, Sakthikumar S,**  
734 **Cuomo CA, Zeng Q, Wortman J, Young SK, Earl AM.** 2014. Pilon: An  
735 Integrated Tool for Comprehensive Microbial Variant Detection and Genome  
736 Assembly Improvement. *PLOS ONE* **9**, e112963.

737 **Wang M, Weiberg A, Lin FM, Thomma BP, Huang HD, Jin H.** 2016.  
738 Bidirectional cross-kingdom RNAi and fungal uptake of external RNAs confer  
739 plant protection. *Nat Plants* **2**, 16151.

740 **Wassenegger M, Dalakouras A.** 2021. Viroids as a Tool to Study RNA-  
741 Directed DNA Methylation in Plants. *Cells* **10**, 1187.

742 **Wassenegger M, Heimes S, Riedel L, Sanger HL.** 1994. RNA-directed de  
743 novo methylation of genomic sequences in plants. *Cell* **76**, 567-576.

- 744 **Wassenegger M, Krczal G.** 2006. Nomenclature and functions of RNA-  
745 directed RNA polymerases. Trends Plant Sci **11**, 142-151.
- 746 **Weiberg A, Wang M, Lin FM, Zhao H, Zhang Z, Kaloshian I, Huang HD,**  
747 **Jin H.** 2013. Fungal small RNAs suppress plant immunity by hijacking host  
748 RNA interference pathways. Science **342**, 118-123.
- 749 **Werner B, Koch A, Šečić E, Engelhardt J, Jelonek L, Steinbrenner J,**  
750 **Kogel K-H.** 2021. *Fusarium graminearum* DICER-like-  
751 dependent sRNAs are required for the suppression of host immune genes and  
752 full virulence. bioRxiv, 2021.2005.2017.444440.
- 753 **Wong-Bajracharya J, Singan VR, Monti R, Plett KL, Ng V, Grigoriev IV,**  
754 **Martin FM, Anderson IC, Plett JM.** 2022. The ectomycorrhizal fungus  
755 *Pisolithus microcarpus* encodes a microRNA involved in cross-kingdom gene  
756 silencing during symbiosis. Proc Natl Acad Sci U S A **119**.
- 757 **Wu J, Yang J, Cho WC, Zheng Y.** 2020. Argonaute proteins: Structural  
758 features, functions and emerging roles. J Adv Res **24**, 317-324.
- 759 **Zhang T, Ren P, Chaturvedi V, Chaturvedi S.** 2015. Development of an  
760 *Agrobacterium*-mediated transformation system for the cold-adapted fungi  
761 *Pseudogymnoascus destructans* and *P. pannorum*. Fungal Genetics and  
762 Biology **81**, 73-81.
- 763 **Zhang T, Zhao YL, Zhao JH, Wang S, Jin Y, Chen ZQ, Fang YY, Hua CL,**  
764 **Ding SW, Guo HS.** 2016. Cotton plants export microRNAs to inhibit  
765 virulence gene expression in a fungal pathogen. Nat Plants **2**, 16153.
- 766 **Zhang Z, Wen J, Li J, Ma X, Yu Y, Tan X, Wang Q, Liu B, Li X, Li Y,**  
767 **Gong L.** 2018. The evolution of genomic and epigenomic features in two  
768 *Pleurotus* fungi. Sci Rep **8**, 8313.

769

770



771 **Figure Legends.**

772 **Fig. 1.** Colonization of Nb-WT by FsK. (A) Schematic representation of the  
773 colonization assay. (B) Quantification of fungal colonization in shoot and root  
774 system at 2 and 4 wpi. (C) Impact of the FsK in growth of Nb-WT 4 wpi.

775 **Fig. 2.** Identification of FsK RNAi core machinery. (A) Schematic  
776 representation of FsK DCL, AGO and RDR proteins using DOG1.0 software  
777 (Ren *et al.*, 2009). (B) Maximum likelihood phylogenies of the FsK (indicated  
778 red), *Fusarium graminearum*, *Neurospora crassa* and *Arabidopsis thaliana* (as  
779 an outgroup member) DCL, AGO and RDR proteins using the LG model  
780 matrix and 100 bootstrap replicates for assessing branch support.

781 **Fig. 3.** In vitro RNAi in FsK-sGFP. (A) Schematic representation of the sGFP  
782 transgene that is present in FsK-sGFP. PToxA: promoter for the promoter  
783 from *Pyrenophora tritici-repentis* ToxA gene; sGFP: GFP variant that contains  
784 a serine-to-threonine substitution at amino acid 65; TNOS: terminator for the  
785 nopaline synthase gene. The 445 bp fragment chosen for in vitro  
786 transcription of dsRNA is depicted. (B) Stereoscopic observation of sGFP  
787 fluorescence. (C) Fluorometric analysis for in vitro RNAi in FsK-sGFP.  
788 Vertical axis: RFU: relative fluorescence unit, calculated as the ratio of sGFP-  
789 indicative fluorescence (excitation 488 nm, emission 515 nm) to growth-  
790 indicative absorbance (wavelength 595 nm). Horizontal axis: 1-12: 12 wells  
791 containing FsK-sGFP conidia. 13-24: 12 wells containing FsK-sGFP conidia  
792 plus 100 ng (each well) sGFP dsRNA.

793 **Fig. 4.** Characterization of FsK RNAi machinery. (A) Schematic  
794 representation of the hpGF+GFP transgene. PTrpC: promoter for the  
795 Promoter for *Aspergillus nidulans* trpC gene; GF: 322 bp fragment of the  
796 GFP; intron: *Magnaporthe grisea* cutinase gene intron; TTrpC: promoter for  
797 the Promoter for *Aspergillus nidulans* trpC gene, P35S: Cauliflower mosaic  
798 virus 35S promoter; GFP: full-length (792 bp) green fluorescent protein  
799 (mGFP-ER version); TNOS: terminator for the nopaline synthase gene. FsK-

800 hpGF+GFP transformants contain the full length hpGF+GFP transgene,  
801 whereas FsK-GFP transformants contain only the P35S-GFP-TNOS part of the  
802 transgene. (B) SRNA-seq in FsK-hpGF+GFP #27. All sRNA reads of 18-30-nt  
803 fully matching to GFP region are depicted. With light blue the siRNA reads in  
804 plus polarity, with dark blue the siRNA reads in minus polarity. The Tablet  
805 software (Milne *et al.*, 2013) was used for visualization of the sRNA reads.  
806 (C) Pie graph of the 18-30 nt GFP siRNAs in FsK-hpGF+GFP #27. (D) RT-  
807 qPCR for the estimation of GFP mRNA downregulation in FsK-hpGF+GFP  
808 compared to FsK-GFP. (E) Bisulfite sequencing for cis RdDM. (F) Bisulfite  
809 sequencing for trans RdDM.

810 **Fig. 5.** FsK-hpGF+GFP colonization of Nb-GFP. (A) Schematic overview of the  
811 colonization assay. (B) Systemic silencing phenotypes under ultraviolet light  
812 4-6 wpi. (C) Bisulfite sequencing in the host GFP transgene in both roots and  
813 leaves in silenced Nb-GFP plants.

814

815

A

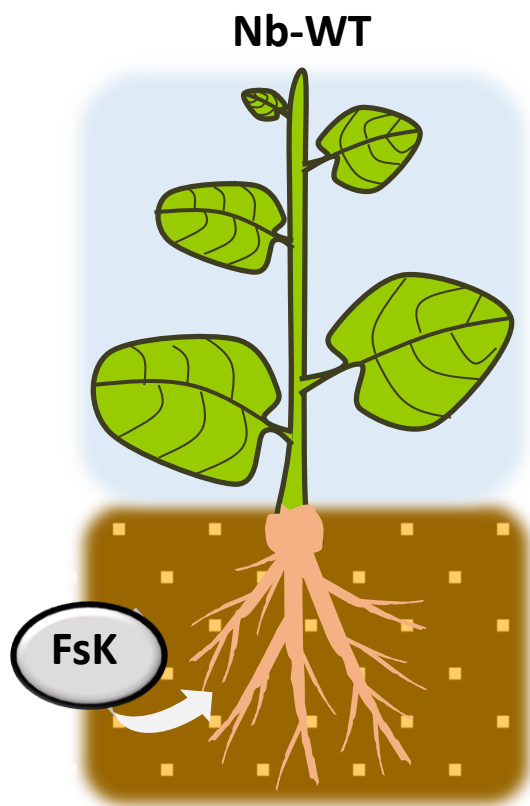

B

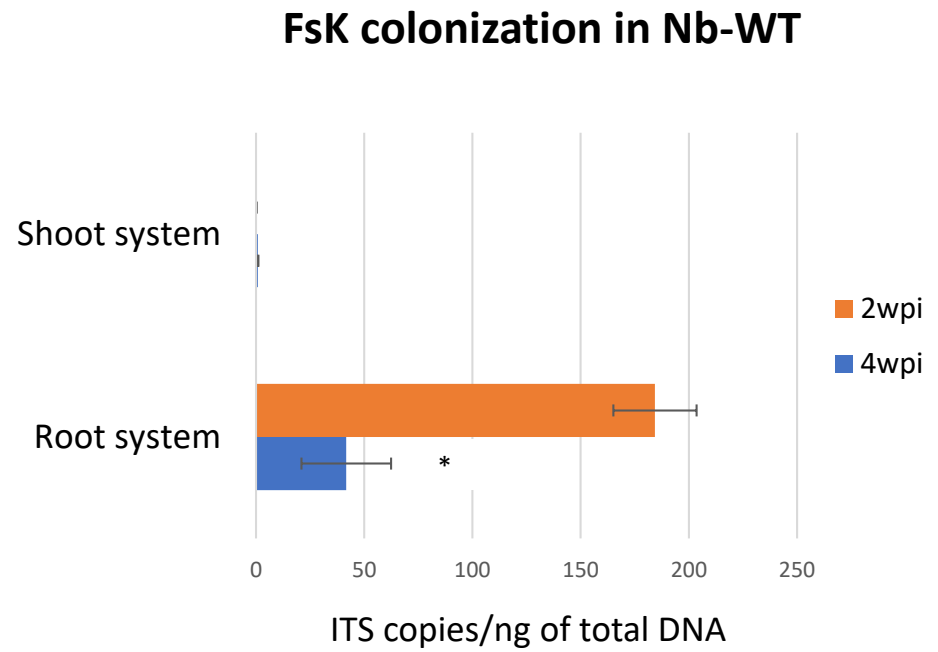

C

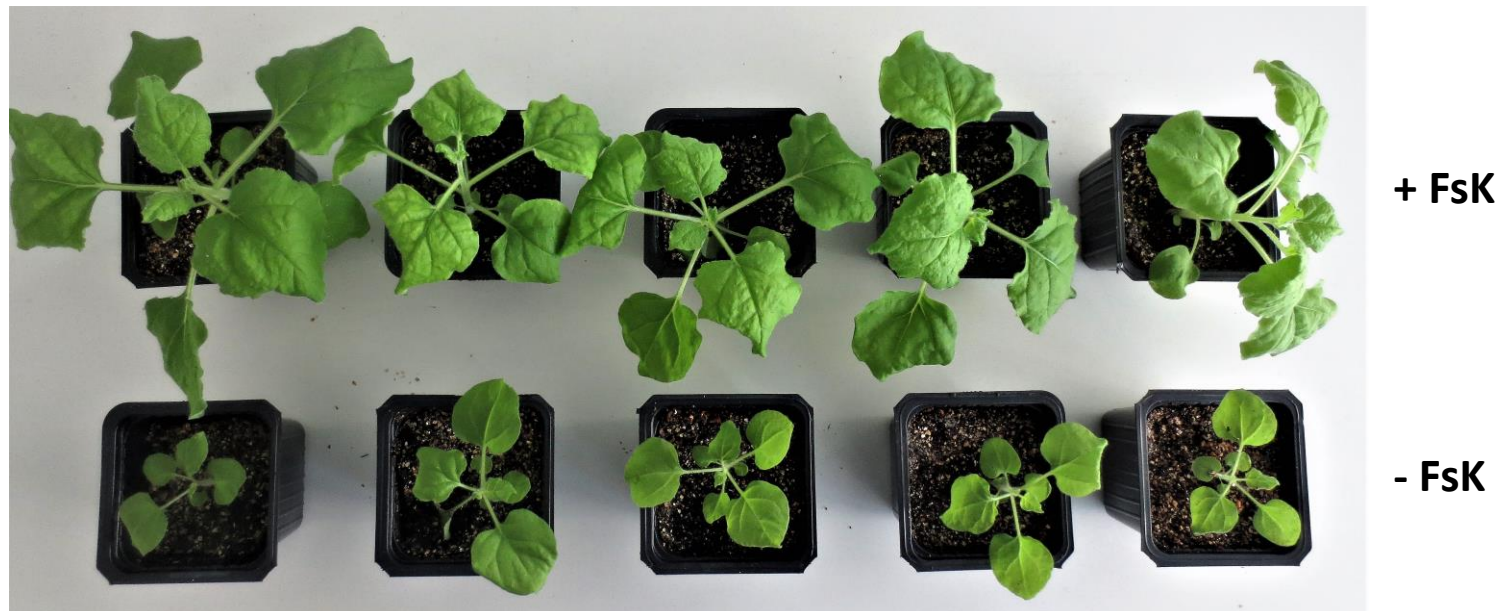

**Fig. 1. Colonization of Nb-WT by Fsk. (A) Schematic representation of the colonization assay. (B) Quantification of fungal colonization in shoot and root system at 2 and 4 wpi. (C) Impact of the Fsk in growth of Nb-WT 4 wpi.**

**A**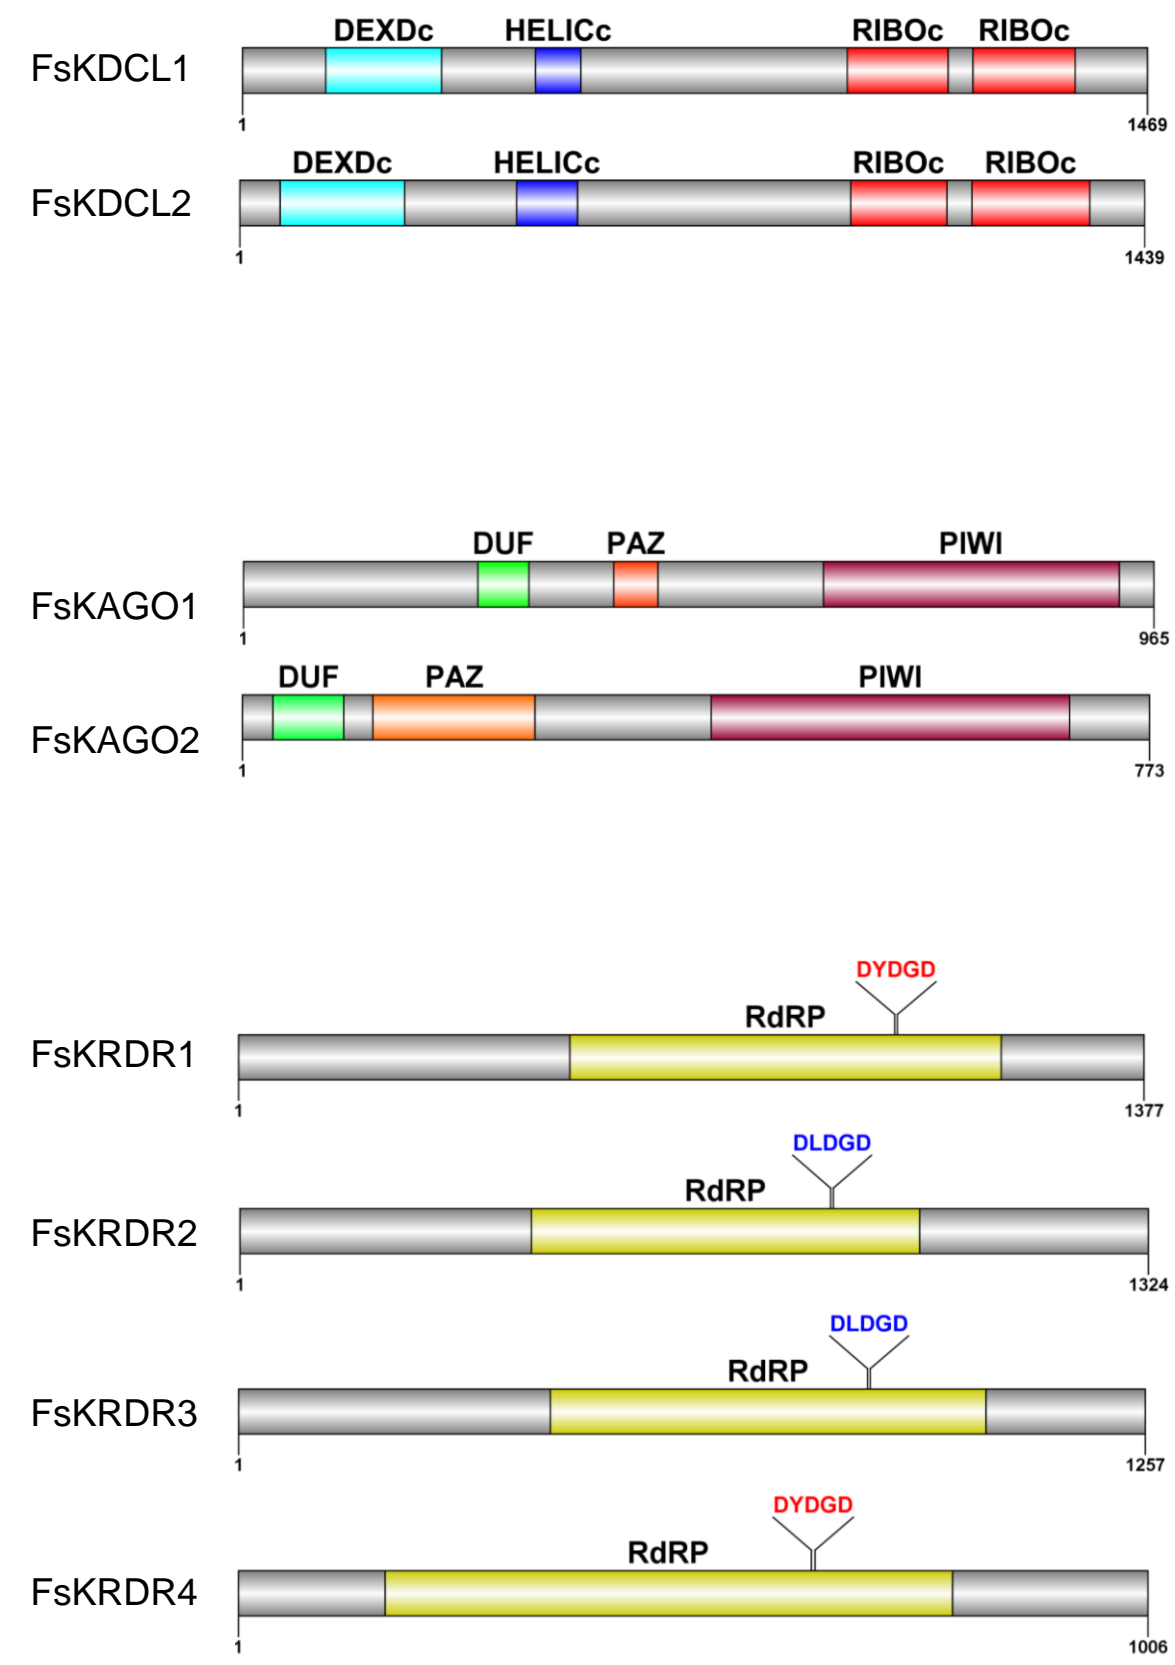**B**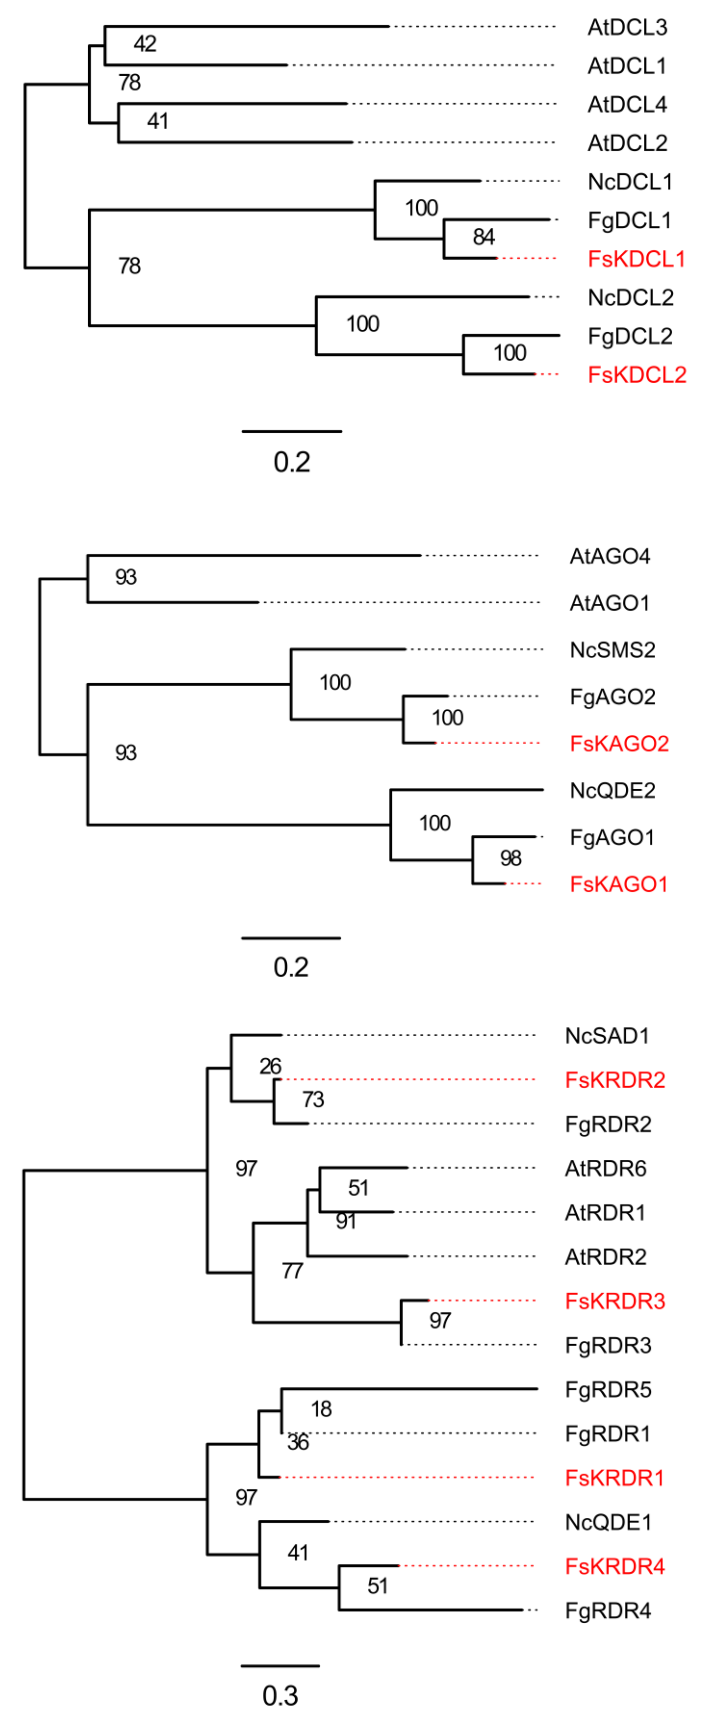

**Fig. 2.** Identification of FSK RNAi core machinery. (A) Schematic representation of FSK DCL, AGO and RDR proteins using DOG1.0 software (Ren et al., 2009). (B) Maximum likelihood phylogenies of the FSK (indicated red), *Fusarium graminearum*, *Neurospora crassa* and *Arabidopsis thaliana* (as an outgroup member) DCL, AGO and RDR proteins using the LG model matrix and 100 bootstrap replicates for assessing branch support.

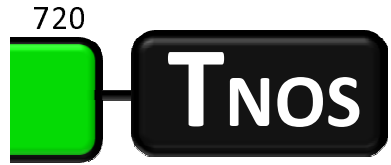

FsK-sGFP

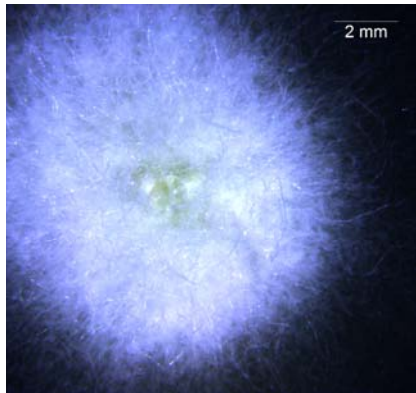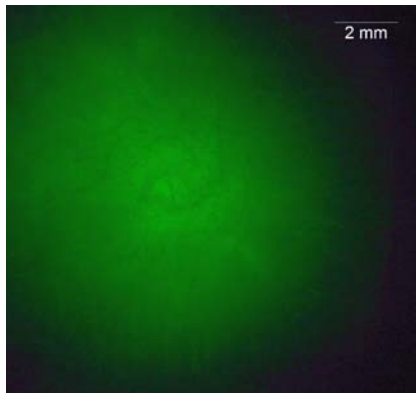

RFU

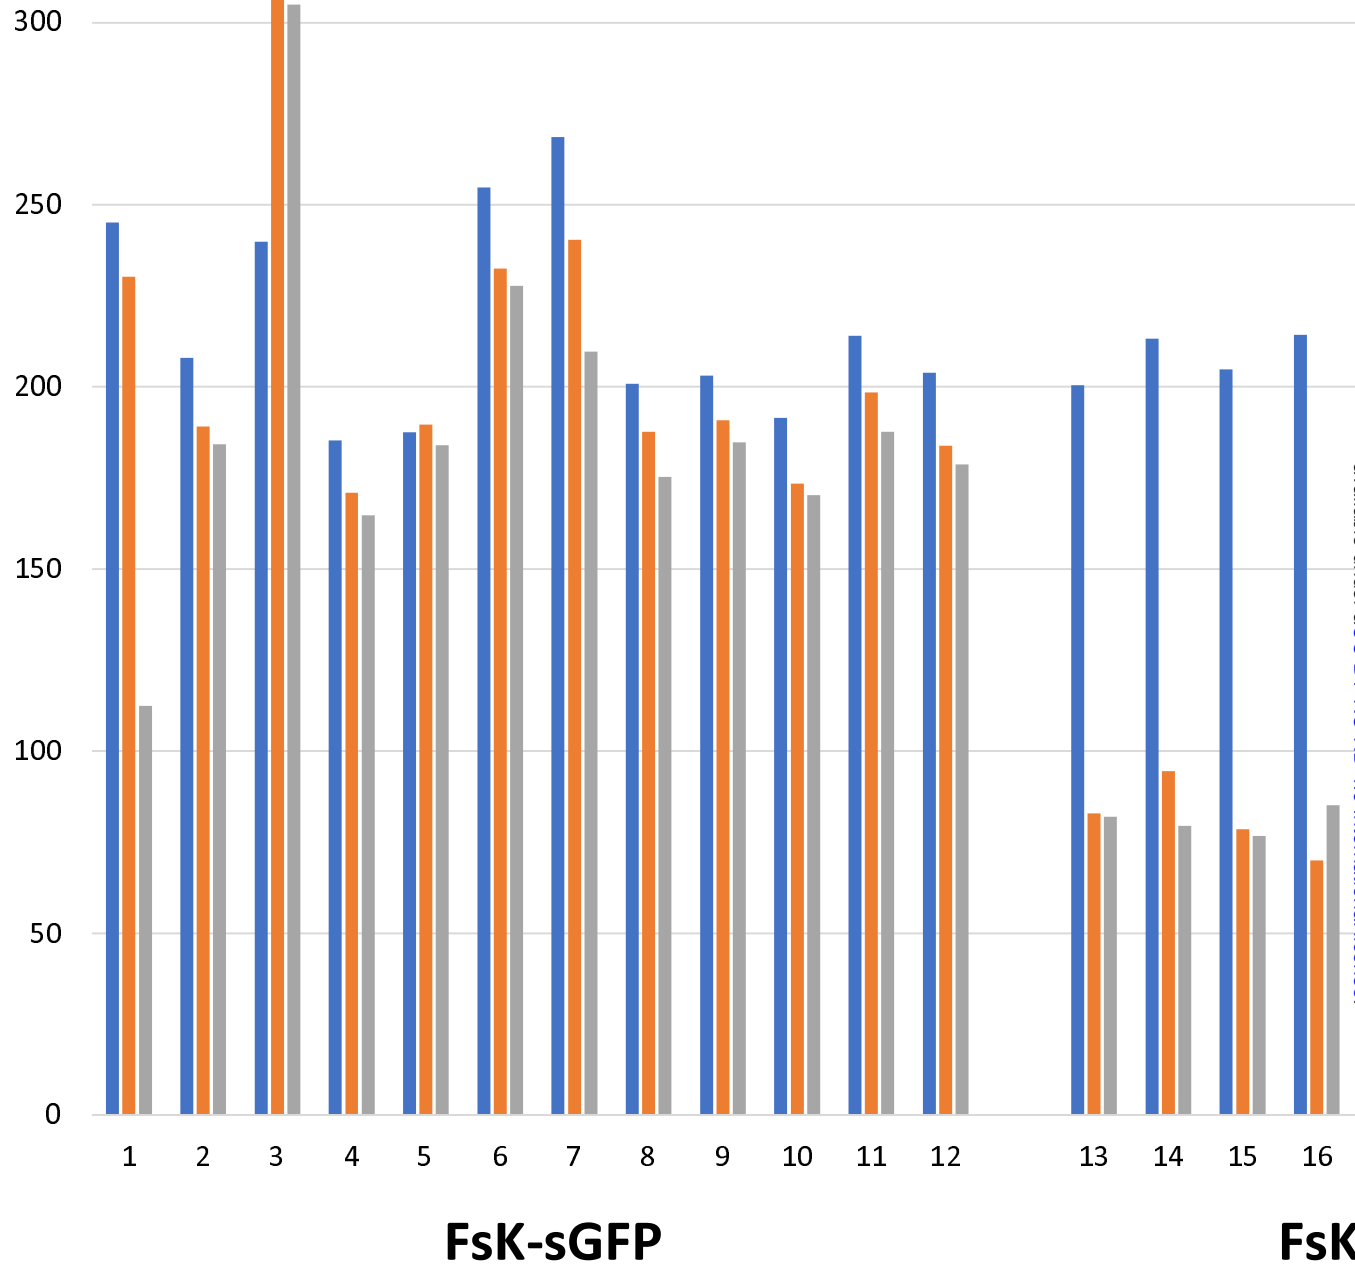

bioRxiv preprint doi: <https://doi.org/10.1101/2022.06.19.496700>; this version posted June 19, 2022. The copyright holder for this preprint (which was not certified by peer review) is the author/funder, who has granted bioRxiv a license to display the preprint in perpetuity. It is made available under aCC-BY-NC-ND 4.0 International license.

sGFP dsRNA (445 bp)

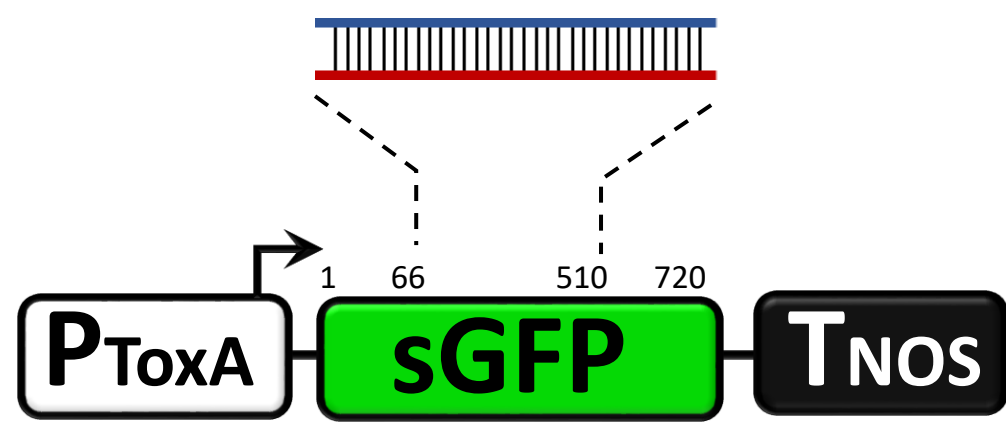

**B**

FsK

FsK-sGFP

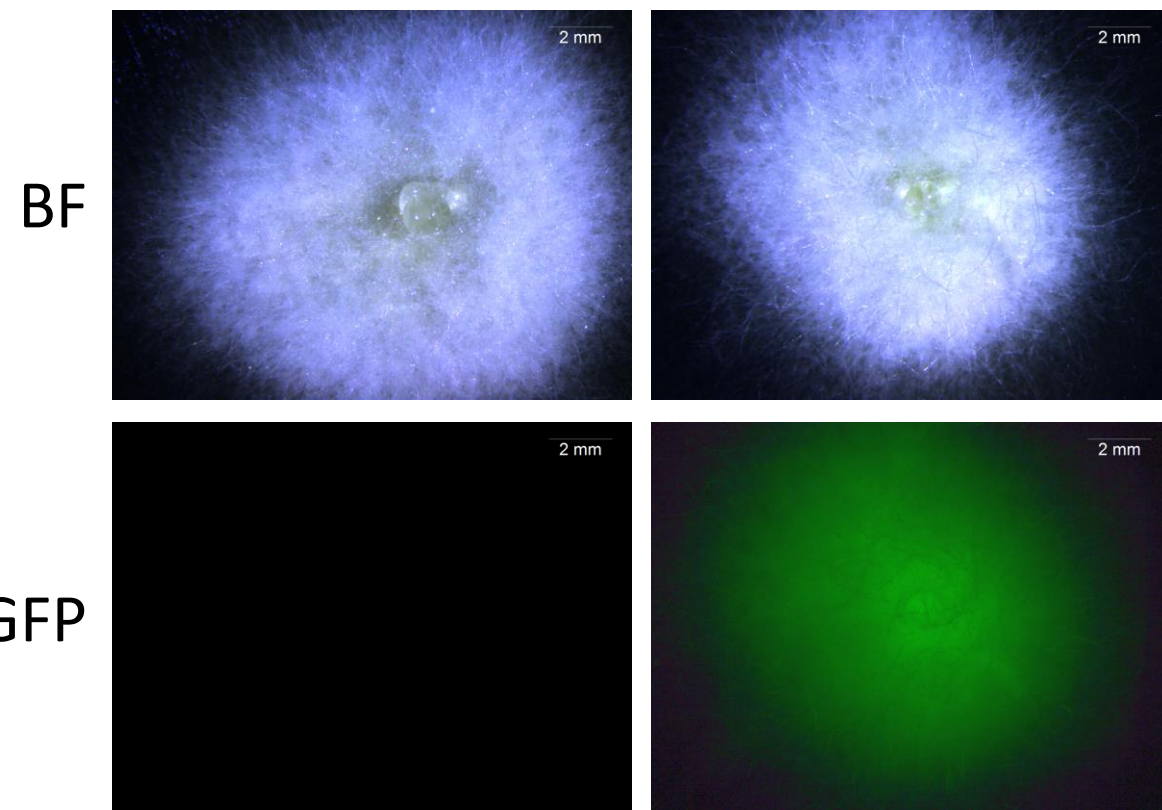

### Fluorometric analysis - in vitro RNAi of FsK-sGFP

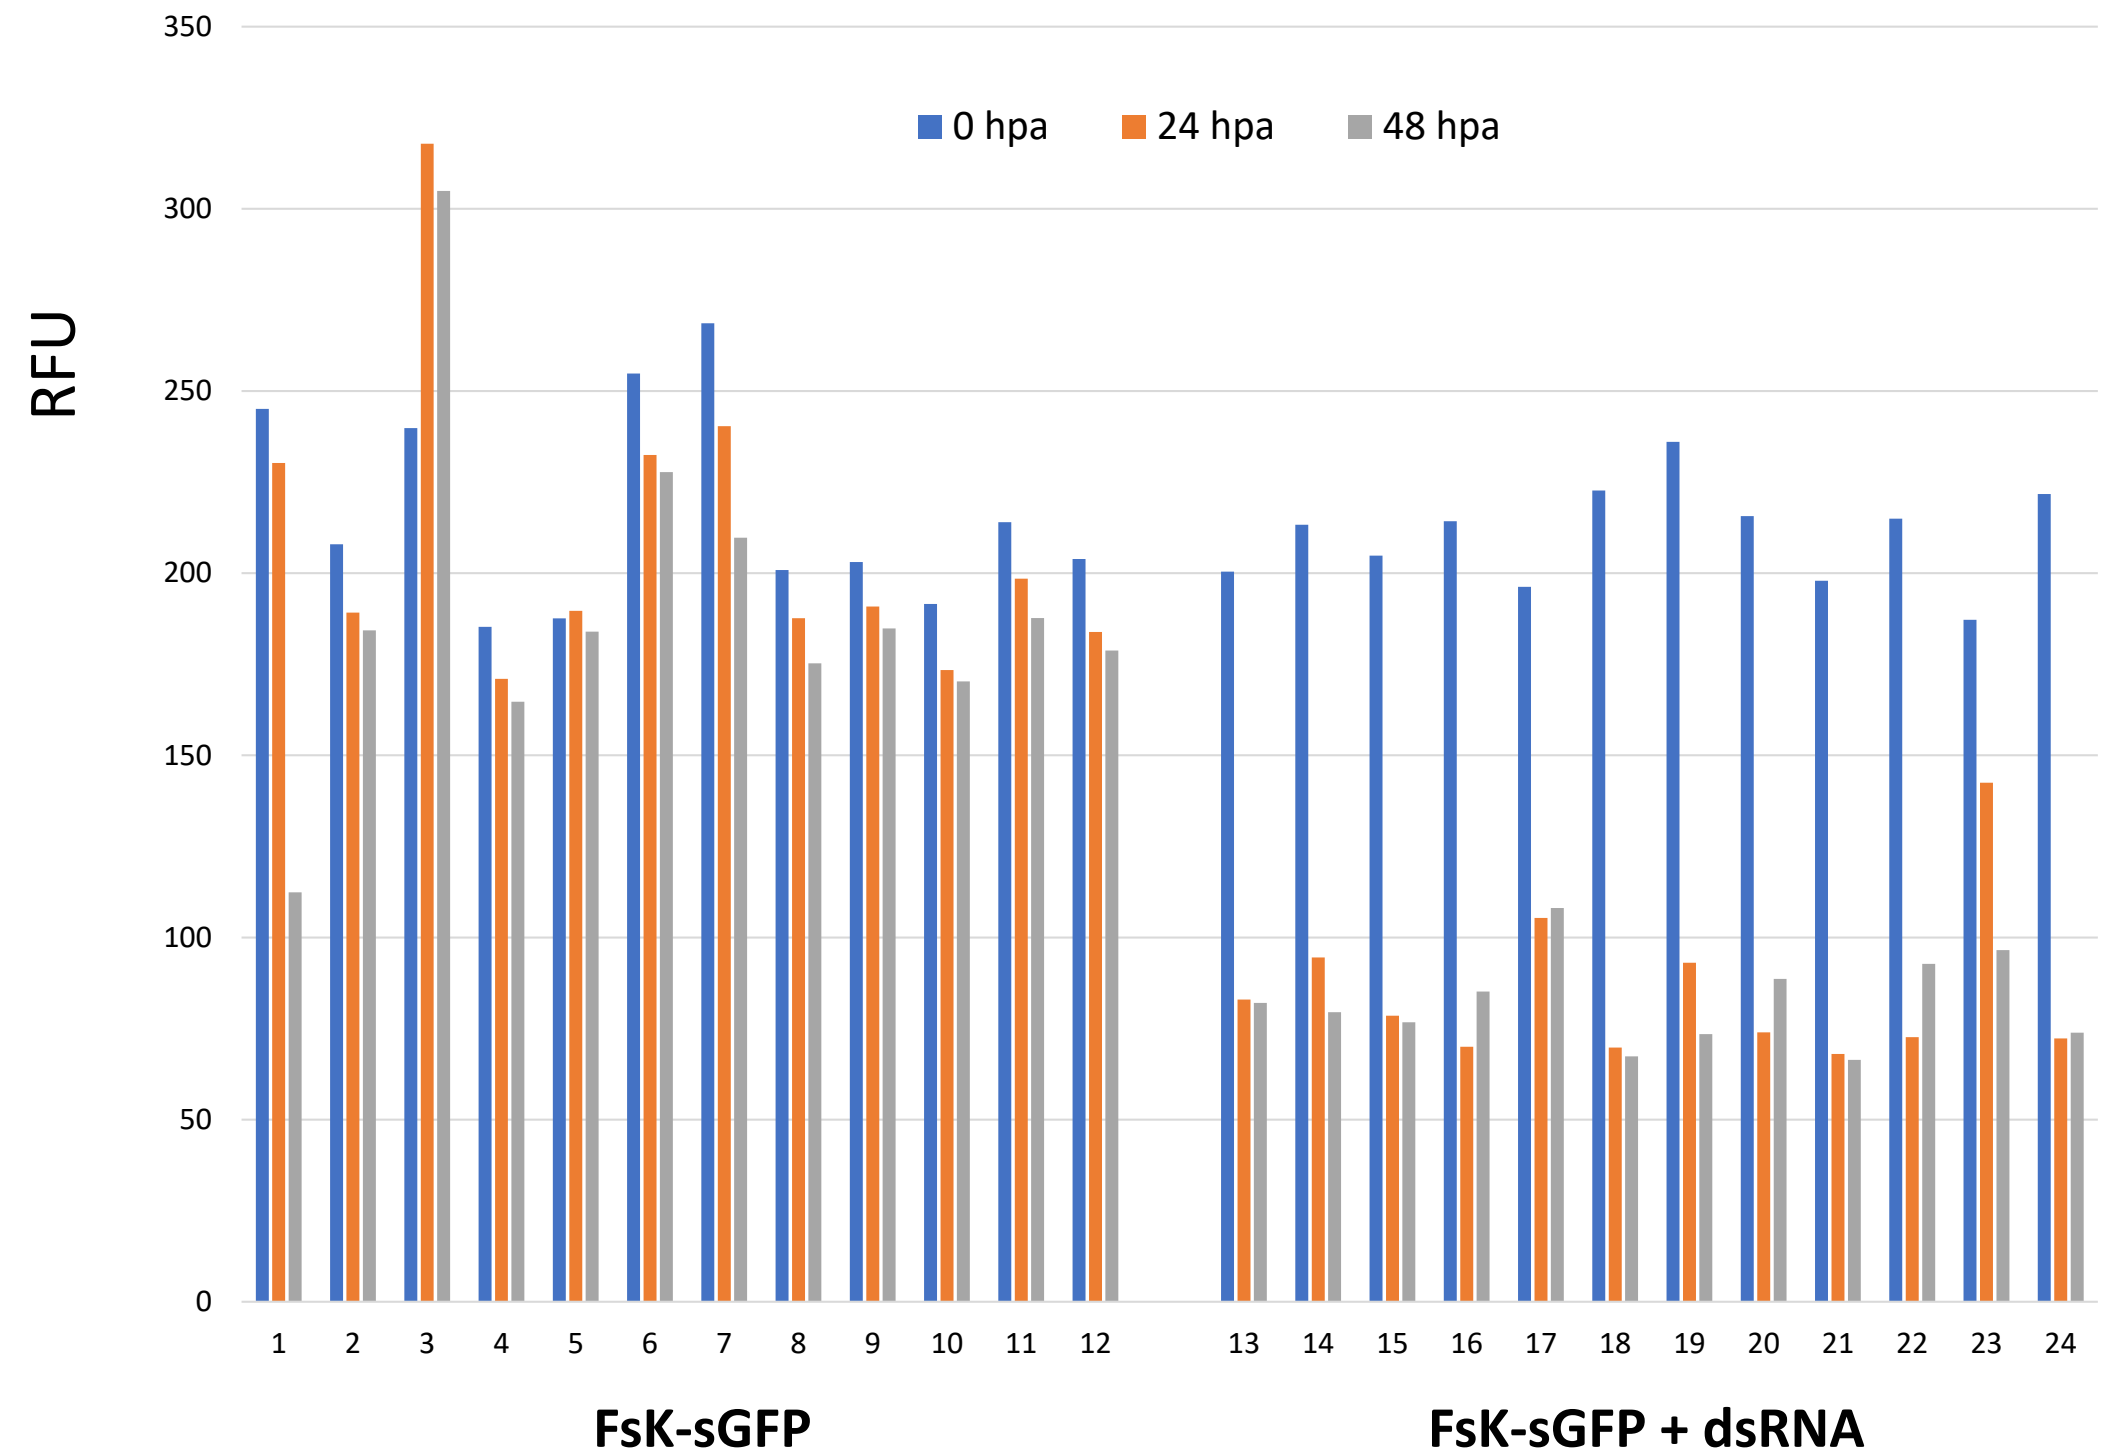

Fig. 3. In vitro RNAi in FsK-sGFP. (A) Schematic representation of the sGFP transgene that is present in FsK-sGFP. PToxA: promoter for the promoter from *Pyrenophora tritici-repentis* ToxA gene; sGFP: GFP variant that contains a serine-to-threonine substitution at amino acid 65; TNOS: terminator for the nopaline synthase gene. The 445 bp fragment chosen for in vitro transcription of dsRNA is depicted. (B) Stereoscopic observation of sGFP fluorescence. (C) Fluorometric analysis for in vitro RNAi in FsK-sGFP. Vertical axis: RFU: relative fluorescence unit, calculated as the ratio of sGFP-indicative fluorescence (excitation 488 nm, emission 515 nm) to growth-indicative absorbance (wavelength 595 nm). Horizontal axis: 1-12: 12 wells containing FsK-sGFP conidia. 13-24: 12 wells containing FsK-sGFP conidia plus 100 ng (each well) sGFP dsRNA.

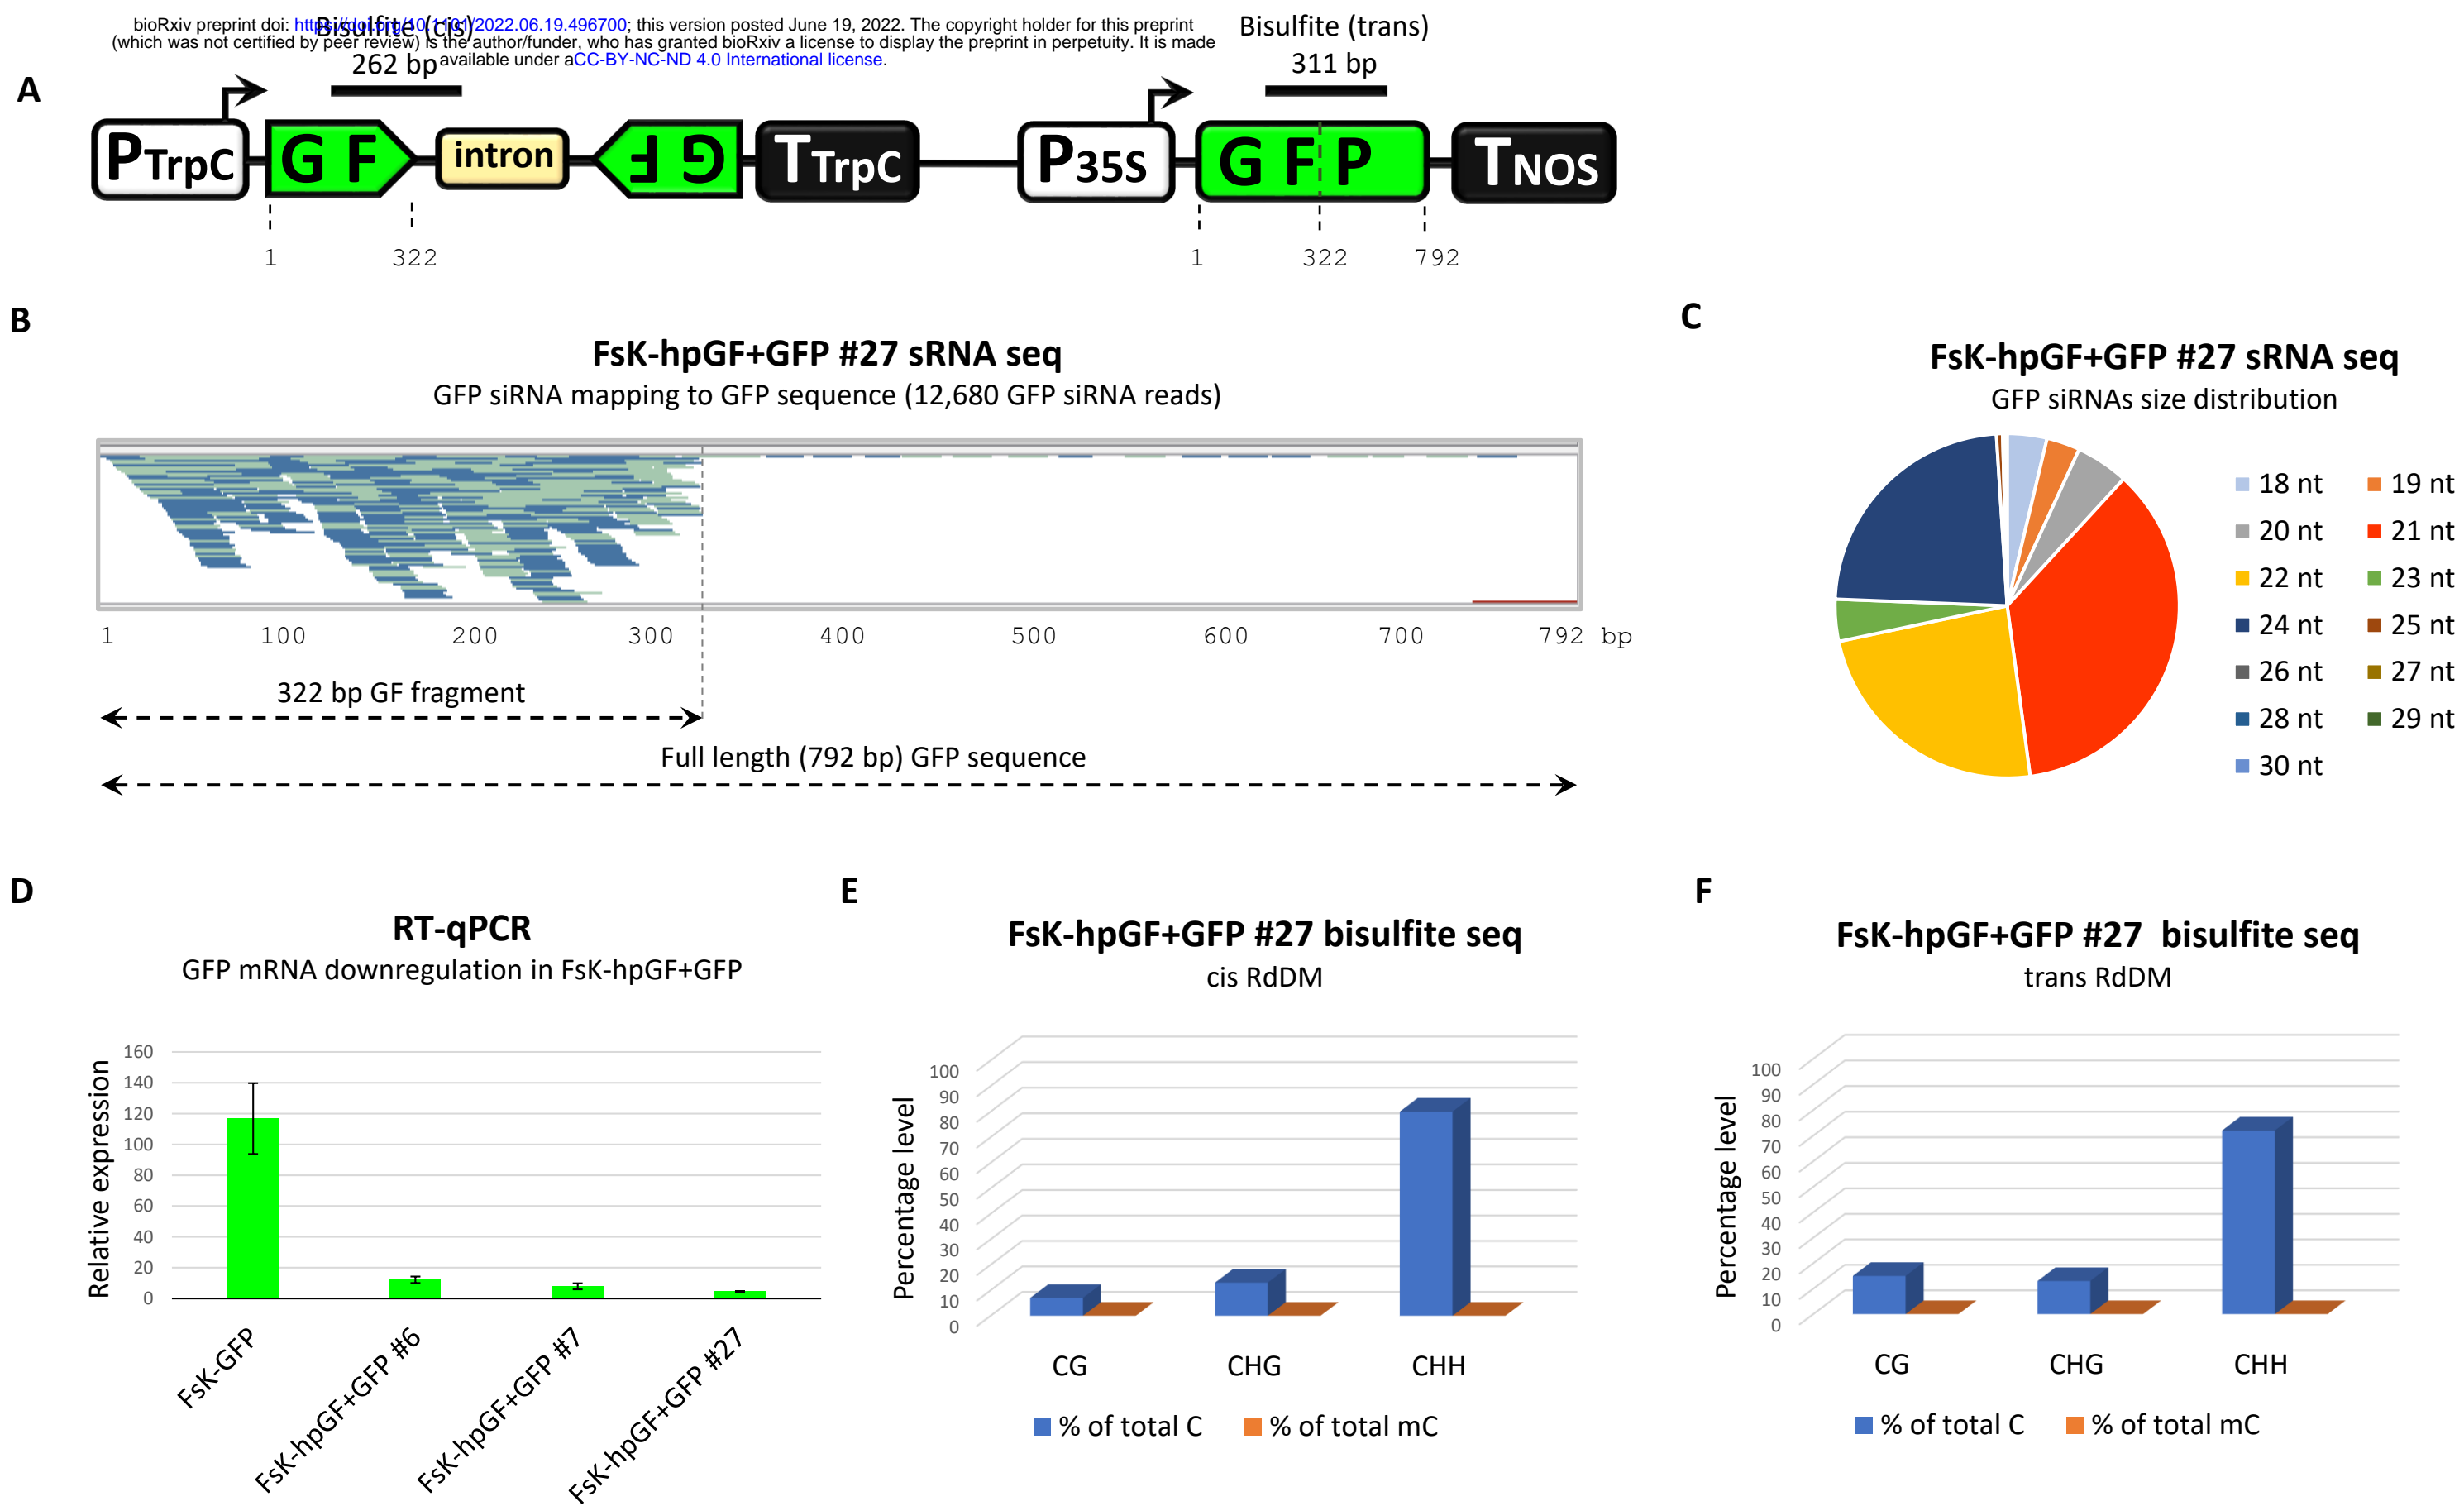

Fig. 4. Characterization of FsK RNAi machinery. (A) Schematic representation of the hpGF+GFP transgene. PTrpC: promoter for the Promoter for *Aspergillus nidulans* trpC gene; GF: 322 bp fragment of the GFP; intron: *Magnaporthe grisea* cutinase gene intron; TTrpC: promoter for the Promoter for *Aspergillus nidulans* trpC gene, P35S: Cauliflower mosaic virus 35S promoter; GFP: full-length (792 bp) green fluorescent protein (mGFP-ER version); TNOS: terminator for the nopaline synthase gene. FsK-hpGF+GFP transformants contain the full length hpGF+GFP transgene, whereas FsK-GFP transformants contain only the P35S-GFP-TNOS part of the transgene. (B) sRNA-seq in FsK-hpGF+GFP #27. All siRNA reads of 18-30-nt fully matching to GFP region are depicted. With light blue the siRNA reads in plus polarity, with dark blue the siRNA reads in minus polarity. The Tablet software (Milne et al., 2013) was used for visualization of the sRNA reads. (C) Pie graph of the 18-30 nt GFP siRNAs in FsK-hpGF+GFP #27. (D) RT-qPCR for the estimation of GFP mRNA downregulation in FsK-hpGF+GFP compared to FsK-GFP. (E) Bisulfite sequencing for cis RdDM. (F) Bisulfite sequencing for trans RdDM.

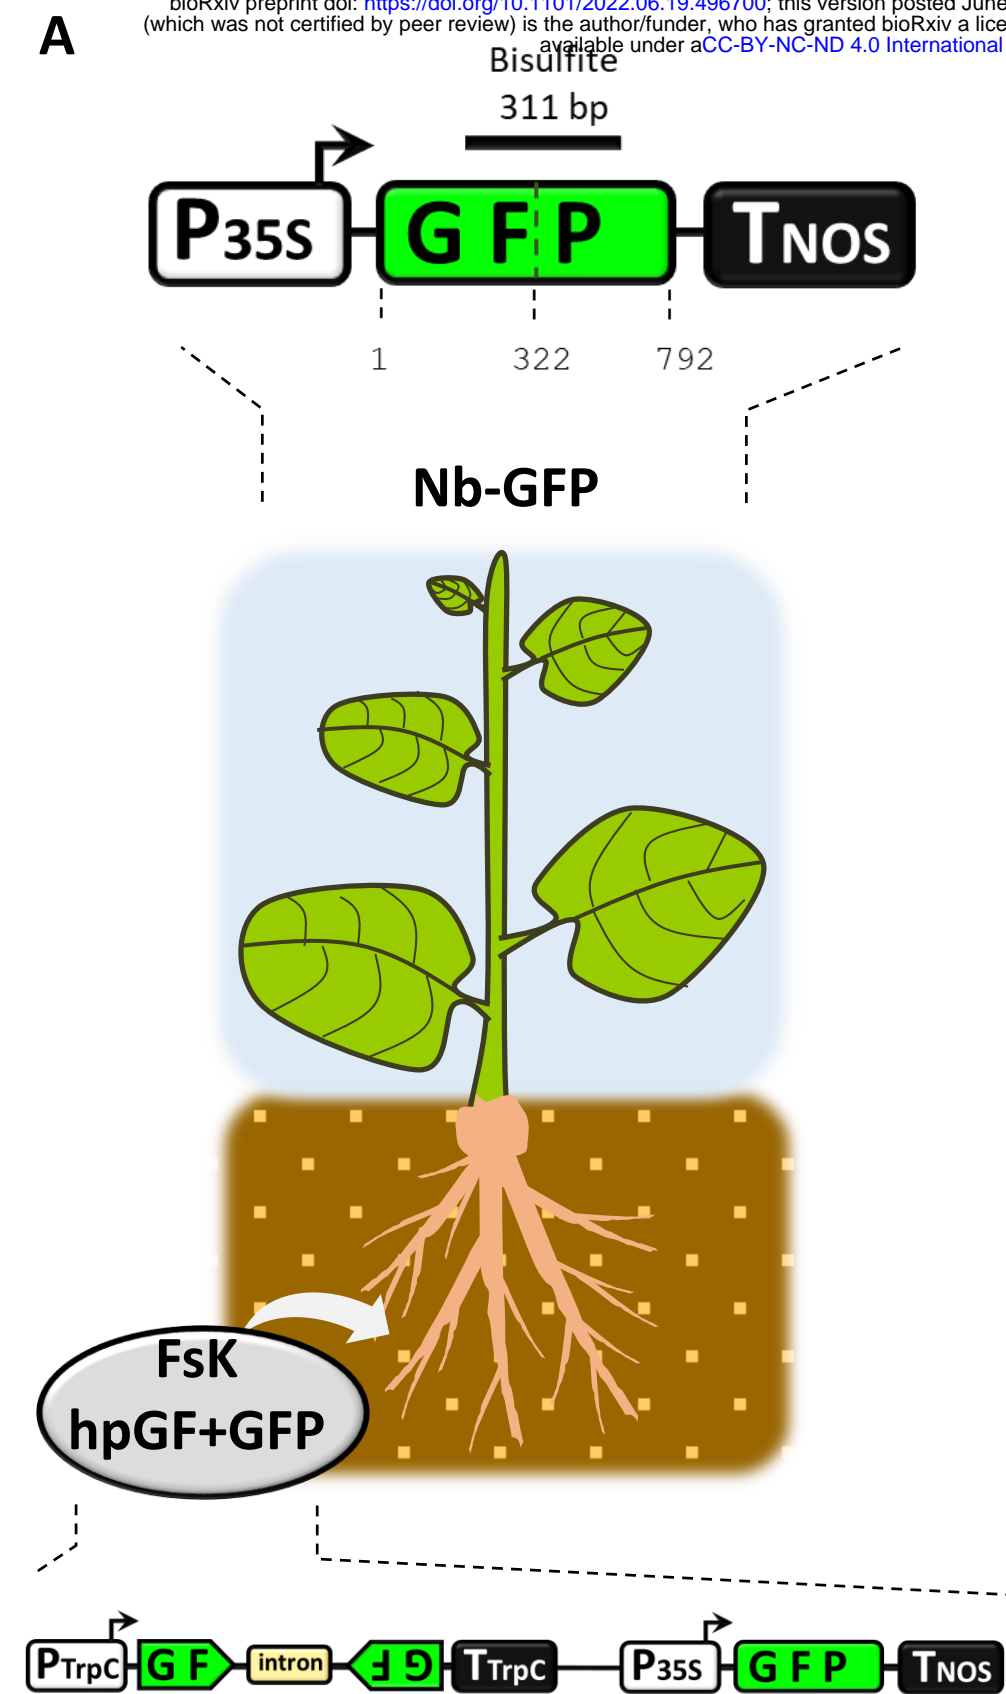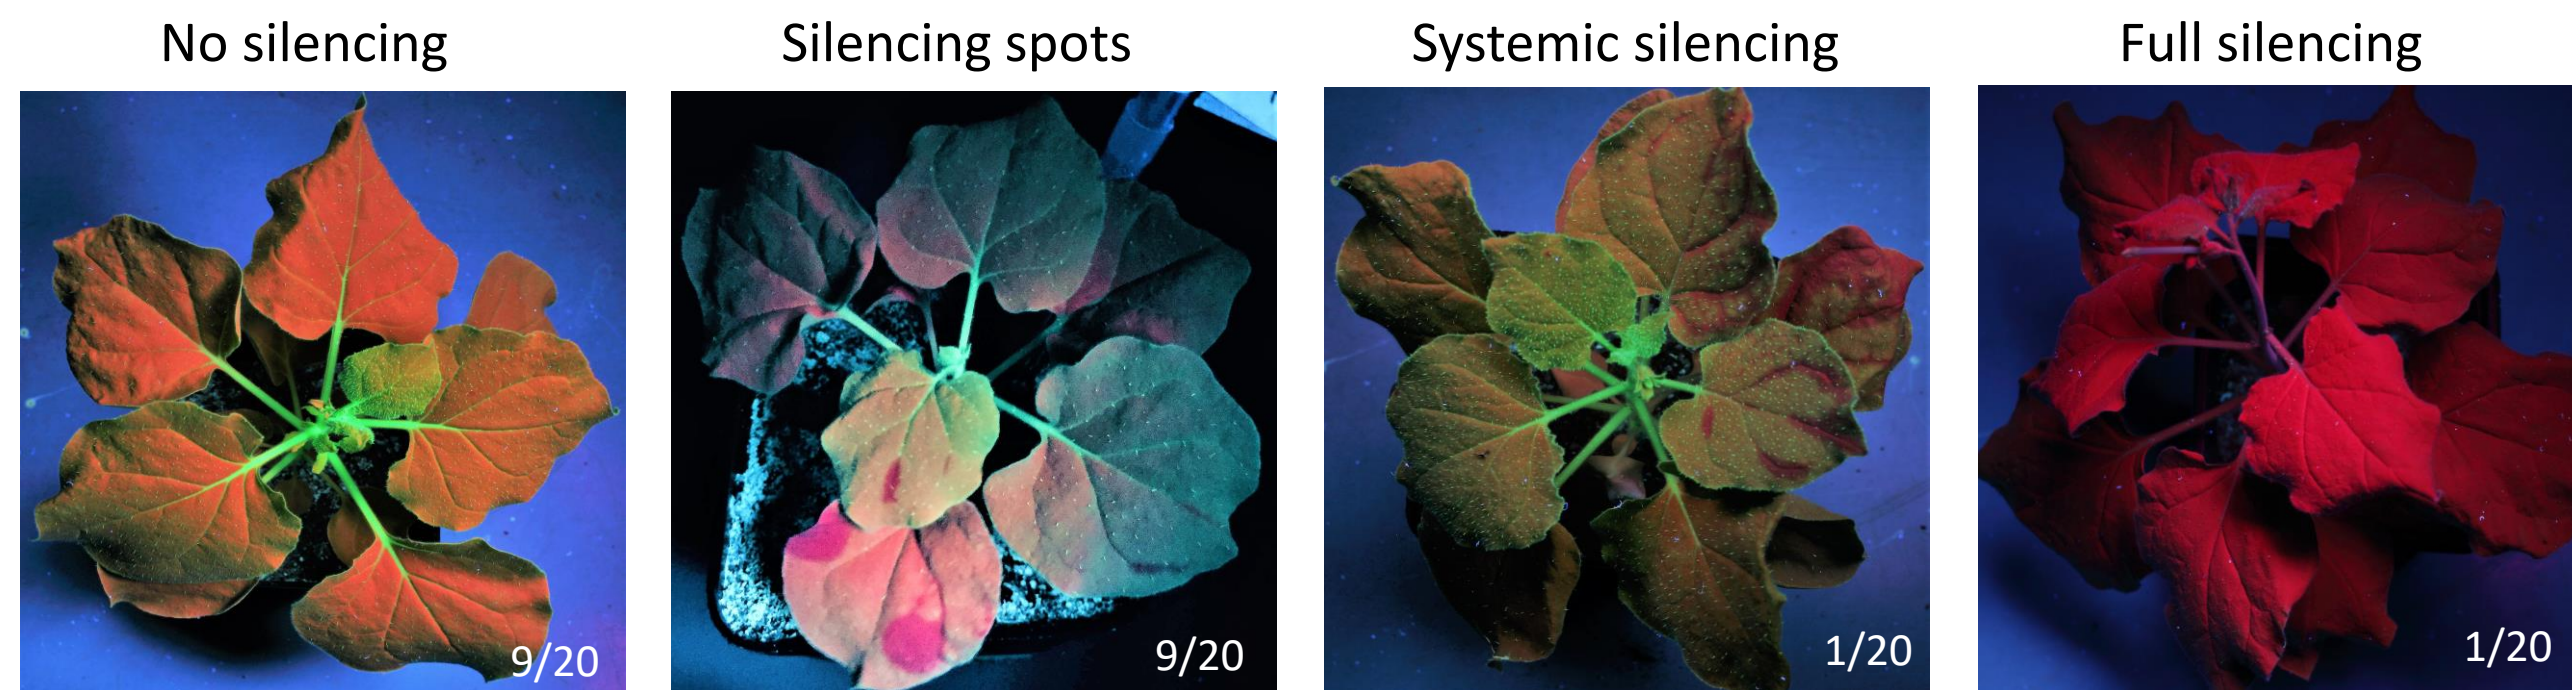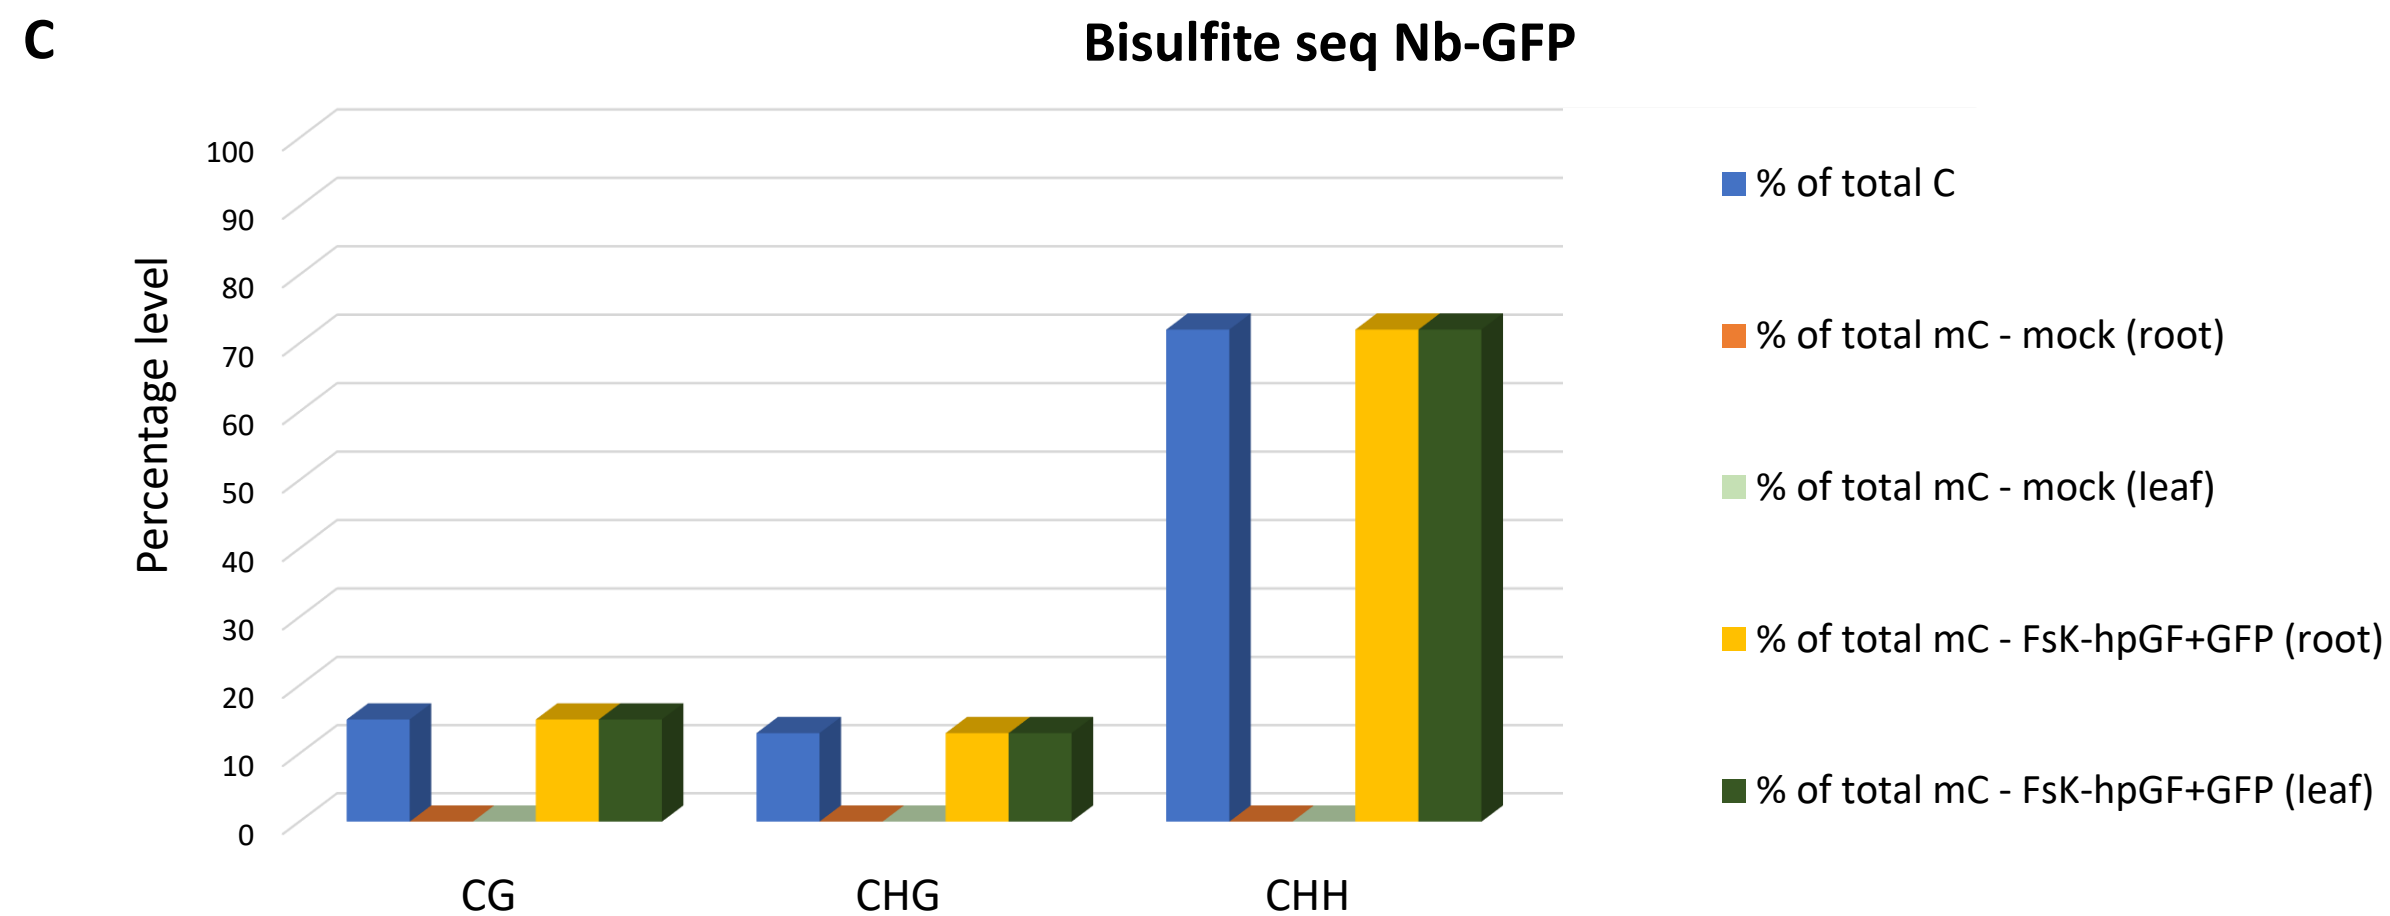

Fig. 5. FsK-hpGF+GFP colonization of Nb-GFP. (A) Schematic overview of the colonization assay. (B) Systemic silencing phenotypes under ultraviolet light 4-6 wpi. (C) Bisulfite sequencing in the host GFP transgene in both roots and leaves in silenced Nb-GFP plants.
